# Supplementary material for: Characterization of essential oils of ten eucalyptus species grown in the greenhouse and in the field
Source: Research Square preprint supplement (doi:10.21203/rs.3.rs-7271800/v1), 2025-09-24
Supplement: Supplementary file 1 [file a4709ecd031006b57c82d5d1.docx]

Eucalyptus species used for essential oil extraction, collection site, and plant age.

| **Place** | **Age (Years)** | **Species** |
| --- | --- | --- |
| Greenhouse  Piracicaba/SP | 1.5 | *Eucalyptus camadulensis*, *Eucalyptus dunnii*, *Eucalyptus exserta, Eucalyptus globulus*, *Eucalyptus grandis*, *Eucalyptus pellita*, *Eucalyptus resinifera, Eucalyptus saligna*, *Eucalyptus urophylla, Corymbia henryi* |
| Field  Itatinga/SP | 24 | *E. camadulensis*, *E. dunnii*, *E. globulus*, *E. grandis*, *E. pellita, E. resinifera, E. saligna*, *E. urophylla* |
| 23 | *E. exserta* |
| 8 | *C. henryi* |

Except for Corymbia henryi, information of all other species were obtained from the database SpeciesLink (<https://specieslink.net/search/map/col/8>).

Information for *Corymbia henryi* was obtained at <https://reflora.jbrj.gov.br/reflora/listaBrasil/ConsultaPublicaUC/BemVindoConsultaPublicaConsultar.do?invalidatePageControlCounter=1&idsFilhosAlgas=&idsFilhosFungos=&lingua=&grupo=5&genero=Corymbia&autor=&nomeVernaculo=&nomeCompleto=&formaVida=null&substrato=null&ocorreBrasil=QUALQUER&ocorrencia=OCORRE&endemismo=TODOS&origem=TODOS&regiao=QUALQUER&estado=QUALQUER&ilhaOceanica=32767&domFitogeograficos=QUALQUER&bacia=QUALQUER&vegetacao=TODOS&mostrarAte=SUBESP_VAR&opcoesBusca=TODOS_OS_NOMES&loginUsuario=Visitante&senhaUsuario=&contexto=consulta-publica>

| **Plantae** **Myrtaceae** ***Eucalyptus*** ***camaldulensis*** Dehnh.. Det: Guimarães, R.F. **HRCB 79035** Coleta: J.Cornachioni s.n. **27/06/1961**. Loc: Rio Claro, São Paulo, Brasil Coord. munic.: [*lat:*-22.41 *long:*-47.560001 *err:*±21773 WGS84][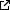](https://specieslink.net/search/util/cria-map?points=-22.41:-47.560001:HRCB%2079035:darkgreen:geo-alt:25&city=Rio%20Claro&state=S%C3%A3o%20Paulo) Notas: C. Linha - L. 61 p. 3 - Lado B; Prancha no. 593 Base do registro: PreservedSpecimen |  |
| --- | --- |

| **Plantae** **Myrtaceae** ***Eucalyptus*** ***dunnii*** Maiden. Det: Guimarães, R.F. **HRCB 36958** Coleta: J.Cornachioni s.n. **27/06/1961**. Loc: Rio Claro, São Paulo, Brasil Coord. munic.: [*lat:*-22.41 *long:*-47.560001 *err:*±21773 WGS84][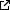](https://specieslink.net/search/util/cria-map?points=-22.41:-47.560001:HRCB%2036958:darkgreen:geo-alt:25&city=Rio%20Claro&state=S%C3%A3o%20Paulo) Notas: C. Linha - L. 38 - Lado B. Prancha no. 540; (Fonte: EUCLID, 2023) Base do registro: PreservedSpecimen |  |
| --- | --- |

| **Plantae** **Myrtaceae** ***Eucalyptus*** ***exserta*** F.Muell.. Det: Cavalcanti, G.R.A. **HRCB 1416** Coleta: Cavalcanti, G.R.A. s.n. **08/1954**. Loc: Rio Claro, São Paulo, Brasil Coord. munic.: [*lat:*-22.41 *long:*-47.560001 *err:*±21773 WGS84][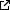](https://specieslink.net/search/util/cria-map?points=-22.41:-47.560001:HRCB%201416:darkgreen:geo-alt:25&city=Rio%20Claro&state=S%C3%A3o%20Paulo) Notas: Coleção nova, folha não muito típica; Ex Herbario FEPASA no. 173; (Fonte: EUCLID, 2023) Base do registro: PreservedSpecimen |  |
| --- | --- |

| **Plantae** **Myrtaceae** ***Eucalyptus*** ***globulus*** ***subsp.maidenii*** (F.Muell.) J.B.Kirkp.. Det: Silva, G. R. **10/04/2023** **HRCB 37049** Coleta: J.Cornachioni s.n. **03/08/1961**. Loc: Rio Claro, São Paulo, Brasil Coord. munic.: [*lat:*-22.41 *long:*-47.560001 *err:*±21773 WGS84][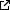](https://specieslink.net/search/util/cria-map?points=-22.41:-47.560001:HRCB%2037049:darkgreen:geo-alt:25&city=Rio%20Claro&state=S%C3%A3o%20Paulo) Notas: Terreiro em frente a casa da sede; Prancha no. 491; (Fonte: EUCLID, 2023) Base do registro: PreservedSpecimen |  |
| --- | --- |

| **Plantae** **Myrtaceae** ***Eucalyptus*** ***grandis*** W.Hill. Det: Cavalcanti, G.R.A. **HRCB 36994** Coleta: J.Cornachioni s.n. **18/10/1960**. Loc: Rio Claro, São Paulo, Brasil Coord. munic.: [*lat:*-22.41 *long:*-47.560001 *err:*±21773 WGS84][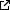](https://specieslink.net/search/util/cria-map?points=-22.41:-47.560001:HRCB%2036994:darkgreen:geo-alt:25&city=Rio%20Claro&state=S%C3%A3o%20Paulo) Notas: Árvore marcada no. 1829; Diâmetro 58 cm; Casca lisa em toda arvore; Prancha no. 394; (Fonte: EUCLID, 2023) Base do registro: PreservedSpecimen |  |
| --- | --- |

| **Plantae** **Myrtaceae** ***Eucalyptus*** ***pellita*** F. Muell.. Det: Cavalcanti, G.R.A. **HRCB 79062** Coleta: Cavalcanti, G.R.A. s.n. **07/1960**. Loc: Rio Claro, São Paulo, Brasil Coord. munic.: [*lat:*-22.41 *long:*-47.560001 *err:*±21773 WGS84][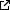](https://specieslink.net/search/util/cria-map?points=-22.41:-47.560001:HRCB%2079062:darkgreen:geo-alt:25&city=Rio%20Claro&state=S%C3%A3o%20Paulo) Notas: Prancha no. 73/627; (Fonte: EUCLID, 2023) Base do registro: PreservedSpecimen |  |
| --- | --- |

| **Plantae** **Myrtaceae** ***Eucalyptus*** ***resinifera*** Sm.. Det: Cavalcanti, G.R.A. **HRCB 37165** Coleta: J.Cornachioni s.n. **10/12/1960**. Loc: Rio Claro, São Paulo, Brasil Coord. munic.: [*lat:*-22.41 *long:*-47.560001 *err:*±21773 WGS84][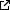](https://specieslink.net/search/util/cria-map?points=-22.41:-47.560001:HRCB%2037165:darkgreen:geo-alt:25&city=Rio%20Claro&state=S%C3%A3o%20Paulo) Notas: Árvore marcada no. 1803; Seedling; Folhas jovens típicas; Prancha no. 451; (Fonte: EUCLID, 2023) Base do registro: PreservedSpecimen |  |
| --- | --- |

| **Plantae** **Myrtaceae** ***Eucalyptus*** ***saligna*** Sm.. Det: Cavalcanti, G.R.A. **HRCB 1442** Coleta: Cavalcanti, G.R.A. s.n. **08/1960**. Loc: Rio Claro, São Paulo, Brasil Coord. munic.: [*lat:*-22.41 *long:*-47.560001 *err:*±21773 WGS84][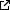](https://specieslink.net/search/util/cria-map?points=-22.41:-47.560001:HRCB%201442:darkgreen:geo-alt:25&city=Rio%20Claro&state=S%C3%A3o%20Paulo) Notas: Árvore marcada no. 1151; Ex Herbario FEPASA no. 608/60; (Fonte: EUCLID, 2023) Base do registro: PreservedSpecimen |  |
| --- | --- |

| **Plantae** **Myrtaceae** ***Eucalyptus*** ***urophylla*** S.T.Blake **HRCB 80898** Coleta: Flores, T.B. 111 Loc: Itatinga, São Paulo, Brasil Coord. munic.: [*lat:*-23.1 *long:*-48.610001 *err:*±28219 WGS84][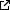](https://specieslink.net/search/util/cria-map?points=-23.1:-48.610001:HRCB%2080898:darkgreen:geo-alt:25&city=Itatinga&state=S%C3%A3o%20Paulo) Base do registro: PreservedSpecimen |  |
| --- | --- |

| *Corymbia henryi*   (S.T.Blake) K.D.Hill & L.A.S.Johnson |
| --- |
|  |
| | [Myrtaceae](javascript:void(0);)  [Juss.](javascript:void(0);)  *[Corymbia](javascript:void(0);)*  [K.D.Hill & L.A.S.Johnson](javascript:void(0);) | | --- | |
| Sinônimos Relevantes   | *[Eucalyptus henryi](javascript:void(0);)* [S.T.Blake](javascript:void(0);) | | --- |  |  | | --- | |
| Vouchers   |  | C.A.Filomeno, s.n., [VIC](http://sweetgum.nybg.org/science/ih/herbarium_details.php?irn=126361) 45086, (MG) | | --- | --- | |  |  | |
