# Supplementary material for: Characterization of essential oils of ten eucalyptus species grown in the greenhouse and in the field
Source: Research Square preprint supplement (doi:10.21203/rs.3.rs-7271800/v1), 2025-09-24
Supplement: Supplementary file 2 [file b1ecb49286f9e794c35f46ab.docx]

## **Supplementary material**

**Table 1S.** Identified constituents of the essential oil of *E. camaldulensis* leaves (from the field) determined by GC-MS. Only peaks over 1% of the total area were identified.

| Peak number | TR (min) | Area % | % similarity | LRI | Compound |
| --- | --- | --- | --- | --- | --- |
| 1 | 4.93 | 12.14 | 97 | 948 | α-Pinene |
| 2 | 5.248 | 0.86 |  |  |  |
| 3 | 5.981 | 14.25 | 92 | 958 | ꞵ-Myrcene |
| 4 | 6.327 | 0.26 |  |  |  |
| 5 | 7.272 | 5.02 | 94 | 1042 | Cymene |
| 6 | 7.377 | 1.36 |  |  | NI |
| 7 | 7.463 | 6.24 | 93 | 1059 | Eucalyptol |
| 8 | 8.219 | 9.86 |  |  | NI |
| 9 | 9.82 | 2.06 | 81 | 1087 | α-Fhenchyl methyl ether |
| 10 | 10.554 | 2.74 | 95 | 1131 | L-Pinocarveol |
| 11 | 10.8 | 0.52 |  |  |  |
| 12 | 11.204 | 0.78 |  |  |  |
| 13 | 11.343 | 2.18 | 93 | 1138 | Isoborneol |
| 14 | 11.671 | 3.99 | 96 | 1137 | Terpinen-4-ol |
| 15 | 12.125 | 4.05 | 96 | 1143 | Terpineol |
| 16 | 12.286 | 1.02 | 94 | 1191 | Myrtenol |
| 17 | 18.591 | 4.11 | 95 | 1386 | (+)-Aromadendrene |
| 18 | 19.118 | 0.72 |  |  |  |
| 19 | 21.599 | 3.62 | 95 | 1530 | Epiglobulol |
| 20 | 21.758 | 0.98 |  |  |  |
| 21 | 22.28 | 13.92 | 94 | 1530 | Globulol |
| 22 | 22.399 | 3.55 | 92 | 1530 | Viridiflorol |
| 23 | 22.611 | 1.92 | 84 | 1593 | ꞵ-Eudesmol |
| 24 | 22.901 | 0.87 |  |  |  |
| 25 | 23.071 | 1.55 | 83 | 1598 | α-Eudesmol |
| 26 | 23.174 | 0.43 |  |  |  |
| 27 | 23.856 | 0.74 |  |  |  |
| 28 | 23.965 | 0.26 |  |  |  |
| Total |  | 100 |  |  |  |
| TR: Retention Time; LRI: Linear Retention Index; NI: not identified | | | | | |

**Table 2S.** Identified constituents of the essential oil of *E. camaldulensis* leaves from the greenhouse determined by GC-MS. Only peaks over 1% of the total area were identified.

| Peak number | TR (min) | Area % | % similarity | LRI | Compound |
| --- | --- | --- | --- | --- | --- |
| 1 | 4.899 | 2.01 | 97 | 948 | α-Pinene |
| 2 | 5.933 | 0.20 |  |  |  |
| 3 | 7.325 | 0.12 |  |  |  |
| 4 | 7.447 | 10.64 | 96 | 1059 | Eucalyptol |
| 5 | 9.538 | 0.16 |  |  |  |
| 6 | 9.812 | 1.92 | 80 | 1087 | α-Fhenchyl methyl ether |
| 7 | 10.157 | 0.10 |  |  |  |
| 8 | 10.549 | 2.76 | 94 | 1131 | L-pinocarveol |
| 9 | 10.795 | 0.17 |  |  |  |
| 10 | 11.111 | 0.14 |  |  |  |
| 11 | 11.195 | 0.73 |  |  |  |
| 12 | 11.339 | 1.71 | 90 | 1138 | Isoborneol |
| 13 | 11.406 | 0.17 |  |  |  |
| 14 | 11.662 | 2.45 | 89 | 1137 | Terpinen-4-ol |
| 15 | 12.172 | 11.23 | 96 | 1143 | α-Terpineol |
| 16 | 12.289 | 0.93 |  |  |  |
| 17 | 12.768 | 0.20 |  |  |  |
| 18 | 12.878 | 0.10 |  |  |  |
| 19 | 13.000 | 0.33 |  |  |  |
| 20 | 13.210 | 0.74 |  |  |  |
| 21 | 13.364 | 0.09 |  |  |  |
| 22 | 13.695 | 0.10 |  |  |  |
| 23 | 14.129 | 0.67 |  |  |  |
| 24 | 14.597 | 0.24 |  |  |  |
| 25 | 16.132 | 0.09 |  |  |  |
| 26 | 16.325 | 2.89 | 95 | 1333 | Α-terpineol acetate |
| 27 | 16.847 | 0.11 |  |  |  |
| 28 | 16.933 | 0.06 |  |  |  |
| 29 | 17.288 | 0.25 |  |  |  |
| 30 | 17.802 | 0.37 |  |  |  |
| 31 | 18.061 | 0.93 |  |  |  |
| 32 | 18.273 | 0.16 |  |  |  |
| 33 | 18.375 | 0.45 |  |  |  |
| 34 | 18.607 | 5.74 | 93 | 1386 | (+)-Aromadendrene |
| 35 | 18.665 | 0.02 |  |  |  |
| 36 | 18.925 | 0.15 |  |  |  |
| 37 | 19.124 | 2.98 | 96 | 1386 | Alloaromadendrene |
| 38 | 19.385 | 0.16 |  |  |  |
| 39 | 19.497 | 0.33 |  |  |  |
| 40 | 19.754 | 0.17 |  |  |  |
| 41 | 19.801 | 0.14 |  |  |  |
| 42 | 19.971 | 1.32 | 93 | 1419 | Viridiflorene |
| 43 | 20.089 | 0.13 |  |  |  |
| 44 | 20.428 | 0.67 |  |  |  |
| 45 | 20.565 | 0.41 |  |  |  |
| 46 | 20.644 | 0.31 |  |  |  |
| 47 | 20.807 | 0.24 |  |  |  |
| 48 | 20.988 | 0.04 |  |  |  |
| 49 | 21.156 | 0.10 |  |  |  |
| 50 | 21.24 | 0.04 |  |  |  |
| 51 | 21.393 | 0.32 |  |  |  |
| 52 | 21.606 | 4.42 | 94 | 1530 | Epiglobulol |
| 53 | 21.764 | 2.61 | 87 | 1530 | Ledol |
| 54 | 22.321 | 16.7 | 92 | 1530 | Globulol |
| 55 | 22.461 | 7.8 | 84 | 1530 | Viridiflorol |
| 56 | 22.633 | 3.65 | 87 | 1593 | ꞵ-Eudesmol |
| 57 | 22.902 | 1.52 |  |  | NI |
| 58 | 23.084 | 4.27 | 82 | 1598 | α-Eudesmol |
| 59 | 23.167 | 0.30 |  |  |  |
| 60 | 23.474 | 0.30 |  |  |  |
| 61 | 23.732 | 0.16 |  |  |  |
| 62 | 23.835 | 1.06 | 82 | 1647 | Eudesm-7(11)-em-4-ol |
| 63 | 23.960 | 0.25 |  |  |  |
| 64 | 25.711 | 0.30 |  |  |  |
| 65 | 25.918 | 0.17 |  |  |  |
| Total |  | 100 |  |  |  |
| TR: Retention Time; LRI: Linear Retention Index; NI: not identified | | | | | |

**Table 3S.** Identified constituents of the essential oil of *E. dunni* leaves from the field determined by GC-MS. Only peaks over 1% of the total area were identified.

| Peak number | TR (min) | Area % | % similarity | LRI | Compound |
| --- | --- | --- | --- | --- | --- |
| 1 | 4.93 | 12.34 | 97 | 948 | α-Pinene |
| 2 | 5.955 | 0.35 |  |  |  |
| 3 | 6.344 | 0.60 |  |  |  |
| 4 | 6.688 | 0.79 |  |  |  |
| 5 | 7.458 | 48.34 | 95 | 1059 | Eucalyptol |
| 6 | 9.144 | 0.20 |  |  |  |
| 7 | 9.556 | 0.74 |  |  |  |
| 8 | 10.117 | 0.00 |  |  |  |
| 9 | 10.579 | 0.54 |  |  |  |
| 10 | 11.232 | 0.19 |  |  |  |
| 11 | 11.44 | 0.18 |  |  |  |
| 12 | 11.683 | 0.62 |  |  |  |
| 13 | 12.204 | 13.17 | 97 | 1143 | Terpineol |
| 14 | 17.837 | 0.81 |  |  |  |
| 15 | 18.406 | 0.25 |  |  |  |
| 16 | 18.619 | 4.12 | 95 | 1386 | (+)-Aromadendrene |
| 17 | 19.14 | 0.66 |  |  |  |
| 18 | 20.00 | 0.34 |  |  |  |
| 19 | 21.614 | 1.95 | 95 | 1530 | Epiglobulol |
| 20 | 21.777 | 0.53 |  |  |  |
| 21 | 22.271 | 8.94 | 90 | 1530 | Globulol |
| 22 | 22.404 | 1.83 | 88 | 1530 | Viridiflorol |
| 23 | 22.626 | 1.00 | 81 | 1593 | ꞵ-Eudesmol |
| 24 | 22.919 | 0.32 |  |  |  |
| 25 | 23.092 | 0.69 |  |  |  |
| 26 | 23.506 | 0.22 |  |  |  |
| 27 | 23.877 | 0.28 |  |  |  |
| Total |  | 100 |  |  |  |
| TR: Retention Time; LRI: Linear Retention Index. | | | | | |

**Table 4S.** Identified constituents of the essential oil of *E. dunni* leaves from the greenhouse determined by GC-MS. Only peaks over 1% of the total area were identified.

| Peak number | TR (min) | Area % | % similarity | LRI | Compound |
| --- | --- | --- | --- | --- | --- |
| 1 | 4.891 | 0.37 |  |  |  |
| 2 | 7.409 | 5.62 | 96 | 1059 | Eucalyptol |
| 3 | 9.835 | 0.20 |  |  |  |
| 4 | 10.560 | 0.49 |  |  |  |
| 5 | 11.217 | 0.14 |  |  |  |
| 6 | 11.351 | 0.18 |  |  |  |
| 7 | 11.430 | 0.12 |  |  |  |
| 8 | 11.673 | 0.33 |  |  |  |
| 9 | 12.163 | 10.7 | 96 | 1143 | Terpineol |
| 10 | 16.327 | 1.77 | 95 | 1333 | Terpinyl acetate |
| 11 | 16.853 | 0.13 |  |  |  |
| 12 | 16.939 | 0.12 |  |  |  |
| 13 | 17.373 | 0.05 |  |  |  |
| 14 | 17.466 | 0.05 |  |  |  |
| 15 | 17.808 | 0.88 |  |  |  |
| 16 | 18.064 | 0.75 |  |  |  |
| 17 | 18.279 | 0.19 |  |  |  |
| 18 | 18.380 | 0.44 |  |  |  |
| 19 | 18.631 | 8.22 | 93 | 1386 | (+)-Aromadendrene |
| 20 | 18.932 | 0.21 |  |  |  |
| 21 | 19.13 | 2.82 | 88 | 1386 | Alloaromadendrene |
| 22 | 19.394 | 0.22 |  |  |  |
| 23 | 19.503 | 0.39 |  |  |  |
| 24 | 19.761 | 0.21 |  |  |  |
| 25 | 19.808 | 0.25 |  |  |  |
| 26 | 19.98 | 1.99 | 94 | 1419 | Viridiflorene |
| 27 | 20.097 | 0.32 |  |  |  |
| 28 | 20.441 | 1.69 | 94 | 1435 | γ-Muurolene |
| 29 | 20.578 | 0.95 |  |  |  |
| 30 | 20.658 | 1.34 | 90 | 1469 | delta-Cadinene |
| 31 | 20.816 | 0.72 |  |  |  |
| 32 | 20.993 | 0.21 |  |  |  |
| 33 | 21.156 | 0.17 |  |  |  |
| 34 | 21.403 | 0.25 |  |  |  |
| 35 | 21.630 | 7.52 | 95 | 1530 | Epiglobulol |
| 36 | 21.772 | 2.65 | 88 | 1530 | Ledol |
| 37 | 21.859 | 0.28 |  |  |  |
| 38 | 22.291 | 21.81 | 93 | 1530 | Globulol |
| 39 | 22.492 | 9.33 | 87 | 1530 | Viridiflorol |
| 40 | 22.653 | 4.49 | 90 | 1593 | ꞵ-Eudesmol |
| 41 | 22.917 | 1.64 |  |  | NI |
| 42 | 23.100 | 5.03 | 82 | 1598 | α-Eudesmol |
| 43 | 23.180 | 0.54 |  |  |  |
| 44 | 23.481 | 2.22 | 84 | 1626 | γ-Eudesmol |
| 45 | 23.733 | 0.33 |  |  |  |
| 46 | 23.840 | 1.49 | 86 | 1647 | Eudesm-7(11)-em-4-ol |
| 47 | 26.627 | 0.18 |  |  |  |
| Total |  | 100 |  |  |  |
| TR: Retention Time; LRI: Linear Retention Index; NI: not identified | | | | | |

**Table 5S.** Identified constituents of the essential oil of *E. exserta* leaves from the field determined by GC-MS. Only peaks over 1% of the total area were identified.

| Peak number | TR (min) | Area % | % similarity | LRI | Compound |
| --- | --- | --- | --- | --- | --- |
| 1 | 4.975 | 24.29 | 97 | 948 | α-Pinene |
| 2 | 5.265 | 2.35 | 91 | 956 | Cyclopentene,4-ethenyl-1,5,5-trimethyl |
| 3 | 5.960 | 5.57 | 89 | 958 | ꞵ-Myrcene |
| 4 | 7.495 | 40.8 | 95 | 1059 | Eucalyptol |
| 5 | 8.196 | 0.41 |  |  |  |
| 6 | 9.030 | 0.40 |  |  |  |
| 7 | 9.844 | 3.17 |  |  | NI |
| 8 | 10.610 | 6.78 | 96 | 1085 | (-)-cis-Sabinol |
| 9 | 10.824 | 0.49 |  |  |  |
| 10 | 11.240 | 3.99 | 93 | 1114 | Pinocarvone |
| 11 | 11.385 | 3.97 | 92 | 1138 | Isoborneol |
| 12 | 11.681 | 0.99 |  |  |  |
| 13 | 12.158 | 4.67 | 96 | 1143 | Terpineol |
| 14 | 12.301 | 0.59 |  |  |  |
| 15 | 18.089 | 0.25 |  |  |  |
| 16 | 22.062 | 0.47 |  |  |  |
| 17 | 22.217 | 0.81 |  |  |  |
| Total |  | 100 |  |  |  |
| TR: Retention Time; LRI: Linear Retention Index; NI: not identified | | | | | |

**Table 6S.** Identified constituents of the essential oil of *E. exserta* leaves from the greenhouse determined by GC-MS. Only peaks over 1% of the total area were identified.

| Peak number | TR (min) | Area % | % similarity | LRI | Compound |
| --- | --- | --- | --- | --- | --- |
| 1 | 4.897 | 1.92 | 97 | 948 | α-Pinene |
| 2 | 5.244 | 0.13 |  |  |  |
| 3 | 5.933 | 0.37 |  |  |  |
| 4 | 7.274 | 0.19 |  |  |  |
| 5 | 7.457 | 10.52 | 96 | 1059 | Eucalyptol |
| 6 | 8.622 | 0.09 |  |  |  |
| 7 | 9.141 | 0.12 |  |  |  |
| 8 | 9.845 | 4.79 |  |  | NI |
| 9 | 10.076 | 0.09 |  |  |  |
| 10 | 10.154 | 0.46 |  |  |  |
| 11 | 10.622 | 8.69 | 87 | 1085 | (-)-cis-Sabinol |
| 12 | 10.814 | 0.83 |  |  |  |
| 13 | 11.068 | 0.09 |  |  |  |
| 14 | 11.214 | 2.40 | 90 | 1114 | Pinocarvone |
| 15 | 11.373 | 4.12 | 93 | 1138 | Isoborneol |
| 16 | 11.582 | 0.09 |  |  |  |
| 17 | 11.68 | 1.97 | 93 | 1137 | Terpinen-4-ol |
| 18 | 12.206 | 12.04 | 96 | 1143 | Terpineol |
| 19 | 12.361 | 4.83 | 96 | 1191 | Myrtenol |
| 20 | 12.79 | 0.46 |  |  |  |
| 21 | 12.881 | 0.11 |  |  |  |
| 22 | 13.011 | 0.75 |  |  |  |
| 23 | 13.222 | 0.71 |  |  |  |
| 24 | 13.378 | 0.18 |  |  |  |
| 25 | 13.638 | 0.07 |  |  |  |
| 26 | 13.709 | 0.22 |  |  |  |
| 27 | 13.926 | 0.17 |  |  |  |
| 28 | 14.609 | 0.42 |  |  |  |
| 29 | 15.131 | 0.29 |  |  |  |
| 30 | 16.141 | 0.5 |  |  |  |
| 31 | 16.335 | 2.2 | 96 | 1333 | Terpinyl acetate |
| 32 | 16.856 | 0.09 |  |  |  |
| 33 | 16.943 | 0.14 |  |  |  |
| 34 | 17.287 | 0.18 |  |  |  |
| 35 | 17.813 | 0.43 |  |  |  |
| 36 | 18.081 | 2.25 |  |  | NI |
| 37 | 18.285 | 0.14 |  |  |  |
| 38 | 18.385 | 0.27 |  |  |  |
| 39 | 18.621 | 5.68 | 94 | 1386 | (+)-Aromadendrene |
| 40 | 18.676 | 0.04 |  |  |  |
| 41 | 18.938 | 0.37 |  |  |  |
| 42 | 19.129 | 1.96 | 97 | 1386 | Alloaromadendrene |
| 43 | 19.197 | 0.06 |  |  |  |
| 44 | 19.396 | 0.14 |  |  |  |
| 45 | 19.506 | 0.24 |  |  |  |
| 46 | 19.763 | 0.23 |  |  |  |
| 47 | 19.809 | 0.05 |  |  |  |
| 48 | 19.977 | 1.06 | 94 | 1419 | Viridiflorene |
| 49 | 20.100 | 0.22 |  |  |  |
| 50 | 20.435 | 0.68 |  |  |  |
| 51 | 20.571 | 0.14 |  |  |  |
| 52 | 20.651 | 0.52 |  |  |  |
| 53 | 20.833 | 0.10 |  |  |  |
| 54 | 20.992 | 0.06 |  |  |  |
| 55 | 21.169 | 0.91 |  |  |  |
| 56 | 21.386 | 0.52 |  |  |  |
| 57 | 21.589 | 1.07 | 93 | 1530 | Epiglobulol |
| 58 | 21.761 | 0.87 |  |  |  |
| 59 | 22.088 | 3.06 | 93 | 1536 | (-)-Spathulenol |
| 60 | 22.25 | 4.95 | 95 | 1530 | Globulol |
| 61 | 22.412 | 5.41 | 91 | 1530 | Viridiflorol |
| 62 | 22.608 | 1.42 | 88 | 1593 | ꞵ-Eudesmol |
| 63 | 22.749 | 0.16 |  |  |  |
| 64 | 22.918 | 1.75 |  |  | NI |
| 65 | 23.074 | 1.66 | 82 | 1598 | α-Eudesmol |
| 66 | 23.229 | 0.11 |  |  |  |
| 67 | 23.274 | 0.18 |  |  |  |
| 68 | 23.732 | 2.18 |  |  | NI |
| 69 | 23.787 | 0.06 |  |  |  |
| 70 | 23.914 | 0.13 |  |  |  |
| 71 | 24.262 | 0.35 |  |  |  |
| 72 | 29.324 | 0.34 |  |  |  |
| Total |  | 100 |  |  |  |
| TR: Retention Time; LRI: Linear Retention Index; NI: not identified | | | | | |

**Table 7S.** Identified constituents of E*. globulus* leaf essential oil (from the field) determined by GC-MS. Only peaks over 1% of the total area were identified.

| Peak number | TR (min) | Area % | % similarity | LRI | Compound |
| --- | --- | --- | --- | --- | --- |
| 1 | 4.98 | 16.23 | 97 | 948 | α-Pinene |
| 2 | 5.999 | 0.63 |  |  |  |
| 3 | 6.384 | 0.63 |  |  |  |
| 4 | 7.542 | 67.57 | 95 | 1059 | Eucalyptol |
| 5 | 8.246 | 0.33 |  |  |  |
| 6 | 11.742 | 0.35 |  |  |  |
| 7 | 12.18 | 1.72 | 94 | 1143 | α-Terpineol |
| 8 | 16.417 | 5.32 | 87 | 1143 | Terpineol |
| 9 | 17.893 | 0.61 |  |  |  |
| 10 | 18.66 | 1.57 | 94 | 1386 | (+)-Aromadendrene |
| 11 | 19.195 | 0.45 |  |  |  |
| 12 | 20.053 | 0.61 |  |  |  |
| 13 | 21.665 | 0.32 |  |  |  |
| 14 | 22.282 | 2.64 | 88 | 1461 | γ -Gurjuneno |
| 15 | 22.443 | 0.66 |  |  |  |
| 16 | 23.14 | 0.36 |  |  |  |
| Total |  | 100 |  |  |  |
| TR: Retention Time; LRI: Linear Retention Index. | | | | | |

**Table 8S.** Identified constituents of the essential oil of *E. globulus* leaves from the greenhouse determined by GC-MS. Only peaks over 1% of the total area were identified.

| Peak number | TR (min) | Area % | % similarity | LRI | Compound |
| --- | --- | --- | --- | --- | --- |
| 1 | 4.876 | 0.52 |  |  |  |
| 2 | 7.393 | 6.64 | 96 | 1059 | Eucalyptol |
| 3 | 9.851 | 0.13 |  |  |  |
| 4 | 10.593 | 0.27 |  |  |  |
| 5 | 11.369 | 0.19 |  |  |  |
| 6 | 11.723 | 0.19 |  |  |  |
| 7 | 12.145 | 1.74 | 95 | 1143 | Terpineol |
| 8 | 16.321 | 6.45 | 95 | 1333 | Terpinyl acetate |
| 9 | 16.845 | 0.16 |  |  |  |
| 10 | 16.931 | 0.08 |  |  |  |
| 11 | 17.311 | 0.53 |  |  |  |
| 12 | 17.797 | 0.80 |  |  |  |
| 13 | 18.052 | 0.63 |  |  |  |
| 14 | 18.267 | 0.16 |  |  |  |
| 15 | 18.367 | 0.32 |  |  |  |
| 16 | 18.588 | 8.81 | 94 | 1386 | (+)-Aromadendrene |
| 17 | 18.656 | 0.05 |  |  |  |
| 18 | 18.92 | 0.13 |  |  |  |
| 19 | 19.108 | 2.88 | 97 | 1386 | Alloaromadendrene |
| 20 | 19.383 | 0.23 |  |  |  |
| 21 | 19.492 | 0.34 |  |  |  |
| 22 | 19.753 | 0.11 |  |  |  |
| 23 | 19.797 | 0.35 |  |  |  |
| 24 | 19.966 | 2.62 | 94 | 1419 | Viridiflorene |
| 25 | 20.088 | 0.2 |  |  |  |
| 26 | 20.424 | 0.85 |  |  |  |
| 27 | 20.562 | 0.94 |  |  |  |
| 28 | 20.64 | 0.77 |  |  |  |
| 29 | 20.803 | 0.47 |  |  |  |
| 30 | 20.986 | 0.08 |  |  |  |
| 31 | 21.158 | 0.19 |  |  |  |
| 32 | 21.391 | 0.23 |  |  |  |
| 33 | 21.586 | 5.99 | 95 | 1530 | Epiglobulol |
| 34 | 21.747 | 2.54 | 88 | 1530 | Ledol |
| 35 | 21.831 | 0.26 |  |  |  |
| 36 | 22.089 | 0.54 |  |  |  |
| 37 | 22.274 | 24.84 | 92 | 1530 | Globulol |
| 38 | 22.418 | 12.25 | 88 | 1530 | Viridiflorol |
| 39 | 22.604 | 4.51 | 85 | 1593 | ꞵ-Eudesmol |
| 40 | 22.888 | 1.63 |  |  | NI |
| 41 | 23.067 | 6.7 | 89 | 1598 | α-Eudesmol |
| 42 | 23.156 | 0.22 |  |  |  |
| 43 | 23.468 | 0.92 |  |  |  |
| 44 | 23.734 | 0.3 |  |  |  |
| 45 | 23.839 | 1.24 | 82 | 1647 | Eudesm-7(11)-em-4-ol |
| Total |  | 100 |  |  |  |
| TR: Retention Time; LRI: Linear Retention Index; NI: not identified | | | | | |

**Table 9S.** Identified constituents of E*. grandis* leaf essential oil (from the field) determined by GC-MS. Only peaks over 1% of the total area were identified.

| Peak number | TR (min) | Area % | % similarity | LRI | Compound |
| --- | --- | --- | --- | --- | --- |
| 1 | 4.987 | 25.33 | 98 | 948 | α-Pinene |
| 2 | 5.293 | 1.98 | 90 | 956 | Cyclopentene,4-ethenyl-1,5,5-trimethyl |
| 3 | 5.980 | 0.32 |  |  |  |
| 4 | 6.958 | 0.62 |  |  |  |
| 5 | 7.326 | 12.97 | 96 | 1042 | o-Cymene |
| 6 | 7.401 | 1.51 | 94 | 1018 | D-Limonene |
| 7 | 7.490 | 6.72 | 94 | 1059 | Eucalyptol |
| 8 | 8.216 | 1.11 |  |  | NI |
| 9 | 9.860 | 1.97 | 80 | 1087 | α-Fhenchyl methyl ether |
| 10 | 10.19 | 1.50 | 81 | 1090 | 4- Methylenecyclohexylmethanol |
| 11 | 10.603 | 3.95 | 94 | 1131 | trans-Pinocarveol |
| 12 | 10.844 | 0.47 |  |  |  |
| 13 | 11.239 | 0.90 |  |  |  |
| 14 | 11.405 | 4.60 | 97 | 1138 | Isoborneol |
| 15 | 11.705 | 1.24 | 96 | 1137 | Terpinen-4-ol |
| 16 | 12.167 | 5.74 | 96 | 1143 | Terpineol |
| 17 | 14.648 | 0.52 |  |  |  |
| 18 | 16.197 | 0.26 |  |  |  |
| 19 | 16.589 | 0.35 |  |  |  |
| 20 | 16.830 | 0.55 |  |  |  |
| 21 | 18.112 | 0.17 |  |  |  |
| 22 | 18.392 | 0.00 |  |  |  |
| 23 | 18.433 | 0.40 |  |  |  |
| 24 | 18.695 | 0.80 |  |  |  |
| 25 | 18.942 | 0.00 |  |  |  |
| 26 | 19.265 | 5.74 | 69 | 1415 | Tetrahydroactinidiolide |
| 27 | 20.016 | 0.09 |  |  |  |
| 28 | 20.161 | 0.10 |  |  |  |
| 29 | 20.791 | 4.14 |  |  | NI |
| 30 | 21.240 | 4.02 |  |  | NI |
| 31 | 21.807 | 0.38 |  |  |  |
| 32 | 22.100 | 2.95 | 90 | 1536 | (-)-Spathulenol |
| 33 | 22.242 | 0.78 |  |  |  |
| 34 | 22.413 | 1.91 | 89 | 1530 | Viridiflorol |
| 35 | 22.658 | 0.60 |  |  |  |
| 36 | 22.985 | 3.51 |  |  | NI |
| 37 | 23.150 | 0.36 |  |  |  |
| 38 | 23.214 | 0.63 |  |  |  |
| 39 | 23.501 | 0.45 |  |  |  |
| 40 | 23.770 | 0.17 |  |  |  |
| 41 | 23.861 | 0.19 |  |  |  |
| 42 | 24.350 | 0.00 |  |  |  |
| Total |  | 100 |  |  |  |
| TR: Retention Time; LRI: Linear Retention Index; NI: not identified | | | | | |

**Table 10S.** Identified constituents of the essential oil of *E. grandis* leaves from the greenhouse determined by GC-MS. Only peaks over 1% of the total area were identified.

| Peak number | TR (min) | Area % | % similarity | LRI | Compound |
| --- | --- | --- | --- | --- | --- |
| 1 | 4.886 | 1.94 | 97 | 948 | α-Pinene |
| 2 | 5.232 | 0.06 |  |  |  |
| 3 | 5.921 | 0.12 |  |  |  |
| 4 | 7.246 | 0.14 |  |  |  |
| 5 | 7.408 | 7.30 | 96 | 1059 | Eucalyptol |
| 6 | 8.590 | 0.74 |  |  |  |
| 7 | 9.118 | 0.31 |  |  |  |
| 8 | 9.308 | 0.08 |  |  |  |
| 9 | 9.805 | 2.49 | 79 | 1087 | α-Fhenchyl methyl ether |
| 10 | 10.139 | 2.70 | 83 | 1090 | 4- Methylenecyclohexylmethanol |
| 11 | 10.536 | 1.82 | 96 | 1131 | L-Pinocarveol |
| 12 | 10.646 | 0.12 |  |  |  |
| 13 | 10.791 | 0.14 |  |  |  |
| 14 | 11.042 | 0.11 |  |  |  |
| 15 | 11.119 | 0.21 |  |  |  |
| 16 | 11.189 | 0.21 |  |  |  |
| 17 | 11.376 | 9.08 | 93 | 1138 | Isoborneol |
| 18 | 11.673 | 0.34 |  |  |  |
| 19 | 12.133 | 11.39 | 96 | 1143 | Terpineol |
| 20 | 12.754 | 0.11 |  |  |  |
| 21 | 12.981 | 0.44 |  |  |  |
| 22 | 14.364 | 0.12 |  |  |  |
| 23 | 14.595 | 0.12 |  |  |  |
| 24 | 15.514 | 0.07 |  |  |  |
| 25 | 15.781 | 0.41 |  |  |  |
| 26 | 16.145 | 0.18 |  |  |  |
| 27 | 16.315 | 2.35 | 95 | 1333 | Terpinyl acetate |
| 28 | 16.539 | 0.25 |  |  |  |
| 29 | 16.786 | 1.99 | 71 | 1330 | Terpinyl formato |
| 30 | 16.926 | 0.18 |  |  |  |
| 31 | 17.795 | 0.61 |  |  |  |
| 32 | 18.023 | 1.95 |  |  | NI |
| 33 | 18.270 | 0.10 |  |  |  |
| 34 | 18.374 | 0.31 |  |  |  |
| 35 | 18.612 | 10.82 | 93 | 1386 | (+)-Aromadendrene |
| 36 | 19.111 | 1.34 | 95 | 1386 | Alloaromadendrene |
| 37 | 19.230 | 6.46 | 67 | 1415 | Tetrahydroactinidiolide |
| 38 | 19.747 | 0.23 |  |  |  |
| 39 | 19.797 | 0.11 |  |  |  |
| 40 | 19.961 | 0.77 |  |  |  |
| 41 | 20.107 | 0.80 |  |  |  |
| 42 | 20.225 | 0.38 |  |  |  |
| 43 | 20.420 | 1.04 | 94 | 1435 | γ-Muurolene |
| 44 | 20.675 | 1.84 |  |  | NI |
| 45 | 20.791 | 0.23 |  |  |  |
| 46 | 21.196 | 5.88 |  |  | NI |
| 47 | 21.583 | 1.15 | 96 | 1530 | Epiglobulol |
| 48 | 21.752 | 0.68 |  |  |  |
| 49 | 22.035 | 1.15 | 95 | 1536 | (-)-Spathulenol |
| 50 | 22.194 | 2.68 | 94 | 1530 | Globulol |
| 51 | 22.361 | 2.81 | 89 | 1530 | Viridiflorol |
| 52 | 22.540 | 0.38 |  |  |  |
| 53 | 22.710 | 1.63 |  |  | NI |
| 54 | 22.945 | 7.61 |  |  | NI |
| 55 | 23.091 | 0.53 |  |  |  |
| 56 | 23.149 | 0.49 |  |  |  |
| 57 | 23.228 | 0.14 |  |  |  |
| 58 | 23.273 | 0.09 |  |  |  |
| 59 | 23.451 | 0.24 |  |  |  |
| 60 | 23.715 | 1.53 |  |  | NI |
| 61 | 27.125 | 0.09 |  |  |  |
| 62 | 27.717 | 0.19 |  |  |  |
| 63 | 29.309 | 0.22 |  |  |  |
| Total |  | 100 |  |  |  |
| TR: Retention Time; LRI: Linear Retention Index; NI: not identified | | | | | |

**Table 11S.** Identified constituents of the essential oil of *C. henryi* leaves from the field determined by GC-MS. Only peaks over 1% of the total area were identified.

| Peak number | TR (min) | Area % | % similarity | LRI | Compound |
| --- | --- | --- | --- | --- | --- |
| 1 | 4.761 | 1.23 | 95 | 902 | α-Tujeno |
| 2 | 4.919 | 49.60 | 97 | 948 | α-Pinene |
| 3 | 5.956 | 10.92 | 97 | 958 | ꞵ-Myrcene |
| 4 | 7.268 | 0.66 |  |  |  |
| 5 | 7.352 | 1.40 | 94 | 1018 | D-Limonene |
| 6 | 7.441 | 1.70 | 91 | 1059 | Eucalyptol |
| 7 | 8.202 | 11.87 | 91 | 1327 | Acetato de 4-terpinenil |
| 8 | 20.032 | 0.38 |  |  |  |
| 9 | 20.471 | 0.34 |  |  |  |
| 10 | 20.684 | 0.54 |  |  |  |
| 11 | 21.423 | 0.22 |  |  |  |
| 12 | 21.630 | 0.29 |  |  |  |
| 13 | 21.800 | 0.23 |  |  |  |
| 14 | 22.075 | 2.21 | 87 | 1536 | (-)-Spathulenol |
| 15 | 22.227 | 3.20 | 88 | 1574 | ꞵ-Humulene |
| 16 | 22.395 | 0.85 |  |  |  |
| 17 | 22.644 | 0.88 |  |  |  |
| 18 | 22.893 | 0.38 |  |  |  |
| 19 | 23.129 | 0.61 |  |  |  |
| 20 | 23.198 | 1.09 |  |  | NI |
| 21 | 23.316 | 0.13 |  |  |  |
| 22 | 23.506 | 8.27 | 89 | 1580 | t-Cadinol |
| 23 | 23.652 | 0.37 |  |  |  |
| 24 | 23.769 | 0.62 |  |  |  |
| 25 | 23.856 | 2.01 | 83 | 1647 | Eudesm-7(11)-em-4-ol |
| Total |  | 100 |  |  |  |
| TR: Retention Time; LRI: Linear Retention Index; NI: not identified | | | | | |

**Table 12S.** Identified constituents of the essential oil of *C. henryi* leaves from the greenhouse determined by GC-MS. Only peaks over 1% of the total area were identified.

| Peak number | TR (min) | Area % | % similarity | LRI | Compound |
| --- | --- | --- | --- | --- | --- |
| 1 | 4.891 | 0.15 |  |  |  |
| 2 | 5.932 | 0.05 |  |  |  |
| 3 | 7.404 | 2.55 | 93 | 1059 | Eucalyptol |
| 4 | 9.853 | 0.11 |  |  |  |
| 5 | 10.594 | 0.15 |  |  |  |
| 6 | 11.372 | 0.10 |  |  |  |
| 7 | 11.72 | 0.13 |  |  |  |
| 8 | 12.129 | 1.93 | 95 | 1143 | Terpineol |
| 9 | 16.147 | 0.06 |  |  |  |
| 10 | 16.246 | 0.07 |  |  |  |
| 11 | 16.329 | 1.22 | 95 | 1333 | Terpinyl acetate |
| 12 | 16.855 | 0.06 |  |  |  |
| 13 | 16.942 | 0.23 |  |  |  |
| 14 | 17.376 | 0.05 |  |  |  |
| 15 | 17.463 | 0.07 |  |  |  |
| 16 | 17.809 | 0.48 |  |  |  |
| 17 | 18.067 | 0.87 |  |  |  |
| 18 | 18.283 | 0.10 |  |  |  |
| 19 | 18.378 | 0.13 |  |  |  |
| 20 | 18.447 | 0.02 |  |  |  |
| 21 | 18.605 | 4.27 | 94 | 1386 | (+)-Aromadendrene |
| 22 | 18.669 | 0.02 |  |  |  |
| 23 | 18.756 | 0.09 |  |  |  |
| 24 | 18.849 | 0.22 |  |  |  |
| 25 | 18.933 | 0.46 |  |  |  |
| 26 | 19.121 | 1.15 | 95 | 1386 | Alloaromadendrene |
| 27 | 19.426 | 0.58 |  |  |  |
| 28 | 19.509 | 0.56 |  |  |  |
| 29 | 19.757 | 0.14 |  |  |  |
| 30 | 19.805 | 0.03 |  |  |  |
| 31 | 19.893 | 0.28 |  |  |  |
| 32 | 19.976 | 0.65 |  |  |  |
| 33 | 20.110 | 0.82 |  |  |  |
| 34 | 20.479 | 4.49 | 94 | 1435 | γ-Muurolene |
| 35 | 20.594 | 0.12 |  |  |  |
| 36 | 20.729 | 6.91 | 89 | 1440 | ꞵ-Cadinene |
| 37 | 20.887 | 0.25 |  |  |  |
| 38 | 21.010 | 1.05 | 95 | 1440 | α-Muurolene |
| 39 | 21.153 | 0.32 |  |  |  |
| 40 | 21.417 | 6.12 | 96 | 1522 | Elemol |
| 41 | 21.599 | 0.59 |  |  |  |
| 42 | 21.763 | 0.53 |  |  |  |
| 43 | 22.086 | 3.18 | 94 | 1536 | (-)-Spathulenol |
| 44 | 22.221 | 1.89 | 95 | 1530 | Globulol |
| 45 | 22.381 | 1.02 | 92 | 1530 | Viridiflorol |
| 46 | 22.521 | 2.27 |  |  | NI |
| 47 | 22.625 | 1.20 | 82 | 1580 | Cubenol |
| 48 | 22.768 | 3.23 |  |  | NI |
| 49 | 22.884 | 2.04 | 79 | 1580 | t-Muurolol |
| 50 | 23.069 | 0.29 |  |  |  |
| 51 | 23.187 | 0.85 |  |  |  |
| 52 | 23.329 | 5.61 | 89 | 1598 | Agarospirol |
| 53 | 23.611 | 12.96 | 83 | 1614 | Guaiol |
| 54 | 23.895 | 22.26 | 73 | 1614 | Bulnesol |
| 55 | 24.140 | 0.62 |  |  |  |
| 56 | 24.201 | 0.18 |  |  |  |
| 57 | 24.565 | 0.49 |  |  |  |
| 58 | 24.928 | 0.63 |  |  |  |
| 59 | 25.300 | 0.75 |  |  |  |
| 60 | 25.373 | 0.07 |  |  |  |
| 61 | 25.819 | 0.07 |  |  |  |
| 62 | 26.126 | 0.06 |  |  |  |
| 63 | 27.372 | 0.02 |  |  |  |
| 64 | 27.459 | 0.39 |  |  |  |
| 65 | 27.675 | 0.13 |  |  |  |
| 66 | 28.556 | 0.30 |  |  |  |
| 67 | 29.432 | 0.05 |  |  |  |
| 68 | 29.569 | 0.03 |  |  |  |
| 69 | 30.667 | 0.09 |  |  |  |
| 70 | 36.293 | 0.03 |  |  |  |
| 71 | 37.184 | 0.14 |  |  |  |
| 72 | 37.54 | 0.08 |  |  |  |
| 73 | 37.619 | 0.06 |  |  |  |
| 74 | 37.876 | 0.07 |  |  |  |
| 75 | 38.645 | 0.56 |  |  |  |
| 76 | 39.146 | 0.20 |  |  |  |
| Total |  | 100 |  |  |  |
| TR: Retention Time; LRI: Linear Retention Index; NI: not identified | | | | | |

**Table 13S.** Identified constituents of the essential oil of *E. pellita* leaves from the field determined by GC-MS. Only peaks over 1% of the total area were identified.

| Peak number | TR (min) | Area % | % similarity | LRI | Compound |
| --- | --- | --- | --- | --- | --- |
| 1 | 4.900 | 47.23 | 97 | 948 | α-Pinene |
| 2 | 5.304 | 5.73 | 97 | 943 | Canphene |
| 3 | 5.992 | 6.04 | 97 | 943 | ꞵ-Pinene |
| 4 | 6.364 | 0.40 |  |  |  |
| 5 | 7.467 | 8.64 | 94 | 1059 | Eucalyptol |
| 6 | 7.651 | 2.20 |  |  | NI |
| 7 | 7.937 | 0.28 |  |  |  |
| 8 | 8.221 | 0.39 |  |  |  |
| 9 | 9.057 | 0.70 |  |  |  |
| 10 | 9.578 | 0.19 |  |  |  |
| 11 | 9.866 | 2.47 | 80 | 1087 | α-Fhenchyl methyl ether |
| 12 | 10.198 | 0.21 |  |  |  |
| 13 | 10.606 | 3.86 | 94 | 1131 | trans-Pinocarveol |
| 14 | 10.850 | 0.28 |  |  |  |
| 15 | 11.244 | 1.07 | 78 | 1136 | Myrtenal |
| 16 | 11.403 | 3.8 | 93 | 1138 | Isoborneol |
| 17 | 11.565 | 0.22 |  |  |  |
| 18 | 11.722 | 0.45 |  |  |  |
| 19 | 12.173 | 5.28 | 95 | 1143 | Terpineol |
| 20 | 12.335 | 0.18 |  |  |  |
| 21 | 13.042 | 0.20 |  |  |  |
| 22 | 18.140 | 3.22 | 96 | 1494 | Caryophyllene |
| 23 | 18.986 | 0.45 |  |  |  |
| 24 | 20.056 | 0.45 |  |  |  |
| 25 | 21.438 | 0.21 |  |  |  |
| 26 | 21.812 | 0.22 |  |  |  |
| 27 | 22.101 | 0.87 |  |  |  |
| 28 | 22.188 | 1.16 | 79 | 1599 | Trans-Longipinocarveol |
| 29 | 22.244 | 0.35 |  |  |  |
| 30 | 22.417 | 0.79 |  |  |  |
| 31 | 22.658 | 0.45 |  |  |  |
| 32 | 22.787 | 0.16 |  |  |  |
| 33 | 23.115 | 0.20 |  |  |  |
| 34 | 23.221 | 1.65 |  |  | NI |
| Total |  | 100 |  |  |  |
| TR: Retention Time; LRI: Linear Retention Index; NI: not identified | | | | | |

**Table 14S.** Identified constituents of E*. pellita* leaf essential oil (from the greenhouse) determined by GC-MS. Only peaks over 1% of the total area were identified.

| Peak number | TR (min) | Area % | % similarity |  | LRI | Compound |
| --- | --- | --- | --- | --- | --- | --- |
| 1 | 4.884 | 1.85 | 97 |  | 948 | α-Pinene |
| 2 | 5.232 | 0.06 |  |  |  |  |
| 3 | 5.923 | 0.20 |  |  |  |  |
| 4 | 7.249 | 0.07 |  |  |  |  |
| 5 | 7.329 | 0.18 |  |  |  |  |
| 6 | 7.401 | 3.49 | 93 |  | 1059 | Eucalyptol |
| 7 | 9.811 | 2.61 | 80 |  | 1087 | α-Fhenchyl methyl ether |
| 8 | 10.161 | 0.22 |  |  |  |  |
| 9 | 10.547 | 3.10 | 94 |  | 1131 | L-Pinocarveol |
| 10 | 10.793 | 0.23 |  |  |  |  |
| 11 | 11.046 | 0.05 |  |  |  |  |
| 12 | 11.110 | 0.29 |  |  |  |  |
| 13 | 11.195 | 0.65 |  |  |  |  |
| 14 | 11.348 | 4.27 | 92 |  | 1138 | Isoborneol |
| 15 | 11.508 | 0.04 |  |  |  |  |
| 16 | 11.670 | 1.24 | 92 |  | 1137 | Terpinen-4-ol |
| 17 | 12.150 | 8.22 | 94 |  | 1143 | Terpineol |
| 18 | 12.281 | 0.85 |  |  |  |  |
| 19 | 12.768 | 0.18 |  |  |  |  |
| 20 | 12.993 | 0.12 |  |  |  |  |
| 21 | 13.223 | 0.42 |  |  |  |  |
| 22 | 14.600 | 0.48 |  |  |  |  |
| 23 | 16.343 | 5.22 | 96 |  | 1333 | Terpinyl acetate |
| 24 | 16.857 | 0.36 |  |  |  |  |
| 25 | 16.944 | 0.49 |  |  |  |  |
| 26 | 17.815 | 1.33 |  |  |  | NI |
| 27 | 18.090 | 4.82 | 90 |  | 1386 | 1,1,7-Trimethyl-4-methylenedecahydro  -1H-cyclopropa(e)azulene |
| 28 | 18.288 | 0.44 |  |  |  |  |
| 29 | 18.390 | 0.91 |  |  |  |  |
| 30 | 18.661 | 12.32 | 93 |  | 1386 | (+)-Aromadendrene |
| 31 | 18.941 | 1.01 |  |  |  | NI |
| 32 | 19.150 | 5.04 | 95 |  | 1386 | Alloaromadendrene |
| 33 | 19.396 | 0.30 |  |  |  |  |
| 34 | 19.508 | 0.65 |  |  |  |  |
| 35 | 19.762 | 0.45 |  |  |  |  |
| 36 | 19.813 | 0.18 |  |  |  |  |
| 37 | 19.981 | 1.97 | 93 |  | 1419 | Viridiflorene |
| 38 | 20.100 | 0.74 |  |  |  |  |
| 39 | 20.447 | 2.68 | 93 |  | 1435 | γ-Muurolene |
| 40 | 20.575 | 0.26 |  |  |  |  |
| 41 | 20.670 | 2.99 | 77 |  | 1469 | delta-Cadinene |
| 42 | 20.993 | 0.23 |  |  |  |  |
| 43 | 21.155 | 0.26 |  |  |  |  |
| 44 | 21.379 | 1.03 | 83 |  | 1507 | Óxido de Caryophyllene |
| 45 | 21.586 | 1.16 | 94 |  | 1530 | Epiglobulol |
| 46 | 21.756 | 0.94 |  |  |  |  |
| 47 | 22.063 | 1.24 | 90 |  | 1536 | (-)-Spathulenol |
| 48 | 22.132 | 0.48 |  |  |  |  |
| 49 | 22.230 | 5.46 | 94 |  | 1530 | Globulol |
| 50 | 22.388 | 4.28 | 91 |  | 1530 | Viridiflorol |
| 51 | 22.608 | 2.02 | 83 |  | 1580 | Cubenol |
| 52 | 22.741 | 0.66 |  |  |  |  |
| 53 | 22.899 | 0.28 |  |  |  |  |
| 54 | 23.066 | 1.19 | 80 |  | 1598 | α-Eudesmol |
| 55 | 23.188 | 4.91 | 77 |  | 1757 | Humulano-1,6-dien-3-ol |
| 56 | 23.325 | 0.15 |  |  |  |  |
| 57 | 23.413 | 0.34 |  |  |  |  |
| 58 | 23.468 | 0.18 |  |  |  |  |
| 59 | 23.500 | 0.10 |  |  |  |  |
| 60 | 23.606 | 0.44 |  |  |  |  |
| 61 | 23.717 | 0.31 |  |  |  |  |
| 62 | 23.818 | 0.70 |  |  |  |  |
| 63 | 23.909 | 0.34 |  |  |  |  |
| 64 | 24.251 | 0.67 |  |  |  |  |
| 65 | 25.903 | 0.25 |  |  |  |  |
| 66 | 26.571 | 0.18 |  |  |  |  |
| 67 | 27.138 | 0.21 |  |  |  |  |
| 68 | 29.324 | 1.01 |  |  |  | NI |
| Total |  | 100 |  |  |  |  |
| TR: Retention Time; LRI: Linear Retention Index; NI: not identified | | | | | | |

**Table 15S.** Identified constituents of the essential oil of *E. resinifera* leaves from the field determined by GC-MS. Only peaks over 1% of the total area were identified.

| Peak number | TR (min) | Area % | % similarity | LRI | Compound |
| --- | --- | --- | --- | --- | --- |
| 1 | 4.932 | 18.96 | 97 | 948 | α-Pinene |
| 2 | 5.247 | 0.52 |  |  |  |
| 3 | 5.937 | 0.36 |  |  |  |
| 4 | 7.458 | 52.15 | 96 | 1059 | Eucalyptol |
| 5 | 9.822 | 0.91 |  |  |  |
| 6 | 10.162 | 0.55 |  |  |  |
| 7 | 10.558 | 5.49 | 95 | 1131 | L-Pinocarveol |
| 8 | 11.202 | 2.55 | 77 | 1136 | Myrtenal |
| 9 | 11.345 | 1.37 | 92 | 1138 | Isoborneol |
| 10 | 11.691 | 0.43 |  |  |  |
| 11 | 12.119 | 6.50 | 97 | 1143 | Terpineol |
| 12 | 18.079 | 2.82 | 95 | 1494 | Caryophyllene |
| 13 | 18.941 | 0.37 |  |  |  |
| 14 | 20.012 | 0.39 |  |  |  |
| 15 | 21.399 | 0.26 |  |  |  |
| 16 | 21.592 | 0.16 |  |  |  |
| 17 | 21.762 | 0.30 |  |  |  |
| 18 | 22.056 | 2.31 | 93 | 1536 | (-)-Spathulenol |
| 19 | 22.132 | 1.09 |  |  | NI |
| 20 | 22.198 | 0.48 |  |  |  |
| 21 | 22.365 | 0.64 |  |  |  |
| 22 | 22.613 | 0.48 |  |  |  |
| 23 | 23.083 | 0.34 |  |  |  |
| 24 | 23.474 | 0.57 |  |  |  |
| Total |  | 100 |  |  |  |
| TR: Retention Time; LRI: Linear Retention Index; NI: not identified | | | | | |

**Table 16S.** Identified constituents of the essential oil of *E. resinifera* leaves from the greenhouse determined by GC-MS. Only peaks over 1% of the total area were identified.

| Peak number | TR (min) | Area % | % similarity | LRI | Compound |
| --- | --- | --- | --- | --- | --- |
| 1 | 4.908 | 6.85 | 98 | 948 | α-Pinene |
| 2 | 5.246 | 0.93 |  |  |  |
| 3 | 5.937 | 0.12 |  |  |  |
| 4 | 7.413 | 30.27 | 96 | 1059 | Eucalyptol |
| 5 | 8.619 | 0.15 |  |  |  |
| 6 | 9.128 | 0.65 |  |  |  |
| 7 | 9.815 | 3.10 | 80 | 1087 | α-Fhenchyl methyl ether |
| 8 | 10.151 | 0.53 |  |  |  |
| 9 | 10.597 | 10.69 | 95 | 1131 | L-Pinocarveol |
| 10 | 10.775 | 0.00 |  |  |  |
| 11 | 11.033 | 0.00 |  |  |  |
| 12 | 11.208 | 3.73 | 77 | 1136 | Myrtenal |
| 13 | 11.358 | 5.10 | 93 | 1138 | Isoborneol |
| 14 | 11.425 | 0.00 |  |  |  |
| 15 | 11.492 | 0.00 |  |  |  |
| 16 | 11.674 | 0.40 |  |  |  |
| 17 | 12.129 | 5.63 | 95 | 1143 | Terpineol |
| 18 | 12.294 | 0.22 |  |  |  |
| 19 | 12.733 | 0.00 |  |  |  |
| 20 | 12.99 | 0.21 |  |  |  |
| 21 | 13.25 | 0.01 |  |  |  |
| 22 | 13.366 | 0.24 |  |  |  |
| 23 | 14.567 | 0.00 |  |  |  |
| 24 | 14.983 | 0.00 |  |  |  |
| 25 | 16.323 | 2.07 | 95 | 1333 | Terpinyl acetate |
| 26 | 16.817 | 0.00 |  |  |  |
| 27 | 16.908 | 0.00 |  |  |  |
| 28 | 17.803 | 0.34 |  |  |  |
| 29 | 18.072 | 2.68 | 89 | 1386 | 1,1,7-Trimethyl-4-methylenedecahydro  -1H-cyclopropa(e)azulene |
| 30 | 18.242 | 0.00 |  |  |  |
| 31 | 18.373 | 0.2 |  |  |  |
| 32 | 18.425 | 0.00 |  |  |  |
| 33 | 18.592 | 5.72 | 94 | 1386 | (+)-Aromadendrene |
| 34 | 18.650 | 0.00 |  |  |  |
| 35 | 18.927 | 0.48 |  |  |  |
| 36 | 19.113 | 1.80 | 96 | 1386 | Alloaromadendrene |
| 37 | 19.358 | 0.00 |  |  |  |
| 38 | 19.458 | 0.00 |  |  |  |
| 39 | 19.717 | 0.00 |  |  |  |
| 40 | 19.792 | 0.00 |  |  |  |
| 41 | 19.968 | 0.69 |  |  |  |
| 42 | 20.067 | 0.00 |  |  |  |
| 43 | 20.429 | 0.53 |  |  |  |
| 44 | 20.567 | 0.09 |  |  |  |
| 45 | 20.646 | 0.40 |  |  |  |
| 46 | 20.832 | 0.24 |  |  |  |
| 47 | 21.375 | 0.99 |  |  |  |
| 48 | 21.576 | 0.64 |  |  |  |
| 49 | 21.748 | 0.42 |  |  |  |
| 50 | 21.841 | 0.22 |  |  |  |
| 51 | 22.061 | 4.36 | 94 | 1536 | (-)-Spathulenol |
| 52 | 22.200 | 2.75 | 95 | 1530 | Globulol |
| 53 | 22.358 | 2.07 | 93 | 1530 | Viridiflorol |
| 54 | 22.593 | 0.97 |  |  |  |
| 55 | 22.726 | 0.22 |  |  |  |
| 56 | 23.055 | 0.61 |  |  |  |
| 57 | 23.320 | 0.07 |  |  |  |
| 58 | 23.419 | 1.16 | 82 | 1586 | ꞵ-Cedren-9-α-ol |
| 59 | 23.716 | 0.93 |  |  |  |
| 60 | 23.914 | 0.52 |  |  |  |
| 61 | 24.233 | 0.00 |  |  |  |
| Total |  | 100 |  |  |  |
| TR: Retention Time; LRI: Linear Retention Index. | | | | | |

**Tabela 17S.** Identified constituents of the essential oil of *E. saligna* from the field determined by GC-MS. Only peaks over 1% of the total area were identified.

| Peak number | TR (min) | Area % | % similarity | LRI | Compound |
| --- | --- | --- | --- | --- | --- |
| 1 | 4.89 | 2.74 | 96 | 948 | α-Pinene |
| 2 | 7.226 | 86.24 | 95 | 1042 | o-Cymene |
| 3 | 7.405 | 5.28 | 89 | 1059 | Eucalyptol |
| 4 | 8.185 | 1.6 | 91 | 1327 | 4-terpinenyl acetate |
| 05 | 18.084 | 1.87 | 95 | 1494 | Caryophyllene |
| 6 | 22.175 | 2.27 | 92 | 1536 | (-)-Spathulenol |
| Total |  | 100 |  |  |  |
| TR: Retention Time; LRI: Linear Retention Index. | | | | | |

**Table 18S.** Identified constituents of the essential oil of *E. saligna* leaves from the greenhouse determined by GC-MS. Only peaks over 1% of the total area were identified.

| Peak number | TR (min) | Area % | % similarity | LRI | Compound |
| --- | --- | --- | --- | --- | --- |
| 1 | 4.891 | 1.05 | 94 | 948 | α-Pinene |
| 2 | 7.428 | 2.98 | 90 | 1059 | Eucalyptol |
| 3 | 9.900 | 0.64 |  |  |  |
| 4 | 10.691 | 0.77 |  |  |  |
| 5 | 11.413 | 2.87 | 92 | 1138 | Isoborneol |
| 6 | 16.423 | 1.56 | 93 | 1333 | Terpinyl acetate |
| 7 | 16.877 | 0.17 |  |  |  |
| 8 | 17.818 | 0.57 |  |  |  |
| 9 | 18.075 | 0.97 |  |  |  |
| 10 | 18.285 | 0.15 |  |  |  |
| 11 | 18.385 | 0.25 |  |  |  |
| 12 | 18.451 | 0.13 |  |  |  |
| 13 | 18.572 | 10.53 | 93 | 1386 | (+)-Aromadendrene |
| 14 | 18.686 | 0.18 |  |  |  |
| 15 | 18.971 | 0.28 |  |  |  |
| 16 | 19.12 | 2.88 | 94 | 1386 | Alloaromadendrene |
| 17 | 19.224 | 4.15 | 72 | 1415 | Tetrahydroactinidiolide |
| 18 | 19.400 | 0.06 |  |  |  |
| 19 | 19.819 | 0.20 |  |  |  |
| 20 | 19.984 | 2.01 | 94 | 1419 | Viridiflorene |
| 21 | 20.168 | 0.19 |  |  |  |
| 22 | 20.266 | 0.46 |  |  |  |
| 23 | 20.450 | 0.31 |  |  |  |
| 24 | 20.747 | 0.28 |  |  |  |
| 25 | 21.186 | 6.89 |  |  | NI |
| 26 | 21.416 | 0.57 |  |  |  |
| 27 | 21.608 | 1.60 | 93 | 1530 | Epiglobulol |
| 28 | 21.777 | 2.96 | 89 | 1530 | Ledol |
| 29 | 21.885 | 0.08 |  |  |  |
| 30 | 22.057 | 8.99 | 95 | 1536 | (-)-Spathulenol |
| 31 | 22.210 | 13.12 | 94 | 1530 | Globulol |
| 32 | 22.372 | 14.87 | 93 | 1530 | Viridiflorol |
| 33 | 22.628 | 3.10 | 83 | 1580 | Cubenol |
| 34 | 22.740 | 0.44 |  |  |  |
| 35 | 22.921 | 7.84 |  |  | NI |
| 36 | 23.114 | 2.77 | 80 | 1598 | α-Eudesmol |
| 37 | 23.208 | 0.27 |  |  |  |
| 38 | 23.524 | 1.80 |  |  | NI |
| 39 | 23.803 | 0.39 |  |  |  |
| 40 | 23.900 | 0.67 |  |  |  |
| 41 | 24.317 | 0.00 |  |  |  |
| 42 | 25.617 | 0.00 |  |  |  |
| 43 | 26.142 | 0.00 |  |  |  |
| Total |  | 100 |  |  |  |
| TR: Retention Time; LRI: Linear Retention Index; NI: not identified | | | | | |

**Table 19S.** Identified constituents of the essential oil of *E. urophylla* leaves from the field determined by GC-MS. Only peaks over 1% of the total area were identified.

| Peak number | TR (min) | Area % | % similarity | LRI | Compound |
| --- | --- | --- | --- | --- | --- |
| 1 | 4.909 | 11.06 | 97 | 948 | α-Pinene |
| 2 | 6.325 | 0.53 |  |  |  |
| 3 | 6.673 | 5.21 | 96 | 969 | α-Phellandrene |
| 4 | 7.408 | 8.14 | 95 | 1042 | o-Cymene |
| 5 | 7.571 | 41.41 | 95 | 1059 | Eucalyptol |
| 6 | 7.632 | 0.72 |  |  |  |
| 7 | 8.185 | 2.41 | 96 | 1327 | 4-terpinenyl acetate |
| 8 | 11.681 | 1.58 | 95 | 1137 | Terpinen-4-ol |
| 9 | 12.125 | 2.10 | 96 | 1143 | Terpineol |
| 10 | 16.405 | 16.47 | 93 | 1333 | Terpinyl acetate |
| 11 | 18.086 | 1.00 | 96 | 1494 | Caryophyllene |
| 12 | 20.026 | 1.53 | 86 | 1499 | Biciclogermacreno |
| 13 | 22.056 | 1.30 | 93 | 1536 | (-)-Spathulenol |
| 14 | 22.214 | 2.50 | 88 | 1530 | Globulol |
| 15 | 22.384 | 2.02 | 88 | 1530 | Viridiflorol |
| 16 | 22.623 | 0.90 |  |  |  |
| 17 | 23.183 | 1.12 | 81 | 1580 | (-)-delta-Cadinol |
| Total |  | 100 |  |  |  |
| TR: Retention Time; LRI: Linear Retention Index. | | | | | |

**Table 20S.** Identified constituents of the essential oil of *E. urophylla* leaves from the greenhouse determined by GC-MS. Only peaks over 1% of the total area were identified.

| Peak number | TR (min) | Area % | % similarity | LRI | Compound |
| --- | --- | --- | --- | --- | --- |
| 1 | 4.886 | 1.08 | 96 | 948 | α-Pinene |
| 2 | 5.926 | 0.07 |  |  |  |
| 3 | 7.431 | 8.66 | 96 | 1059 | Eucalyptol |
| 4 | 9.824 | 0.45 |  |  |  |
| 5 | 10.187 | 0.06 |  |  |  |
| 6 | 10.558 | 0.58 |  |  |  |
| 7 | 11.118 | 0.13 |  |  |  |
| 8 | 11.218 | 0.13 |  |  |  |
| 9 | 11.341 | 0.85 |  |  |  |
| 10 | 11.438 | 0.07 |  |  |  |
| 11 | 11.678 | 0.49 |  |  |  |
| 12 | 12.116 | 3.99 | 97 | 1143 | Terpineol |
| 13 | 12.297 | 0.13 |  |  |  |
| 14 | 12.767 | 0.09 |  |  |  |
| 15 | 13.259 | 0.17 |  |  |  |
| 16 | 14.608 | 0.26 |  |  |  |
| 17 | 15.456 | 0.13 |  |  |  |
| 18 | 16.141 | 0.63 |  |  |  |
| 19 | 16.425 | 13.27 | 97 | 1333 | Terpinyl acetate |
| 20 | 16.767 | 0.12 |  |  |  |
| 21 | 16.878 | 0.25 |  |  |  |
| 22 | 16.965 | 0.33 |  |  |  |
| 23 | 17.263 | 2.51 | 96 | 1352 | Geranyl acetate |
| 24 | 17.480 | 0.08 |  |  |  |
| 25 | 17.827 | 1.49 |  |  | NI |
| 26 | 17.952 | 0.07 |  |  |  |
| 27 | 18.081 | 1.43 | 90 | 1386 | 1,1,7-Trimethyl-4-methylenedecahydro  -1H-cyclopropa(e)azulene |
| 28 | 18.292 | 0.34 |  |  |  |
| 29 | 18.394 | 0.56 |  |  |  |
| 30 | 18.461 | 0.04 |  |  |  |
| 31 | 18.676 | 12.53 | 94 | 1386 | (+)-Aromadendrene |
| 32 | 18.947 | 0.37 |  |  |  |
| 33 | 19.159 | 3.7 | 96 | 1386 | Alloaromadendrene |
| 34 | 19.402 | 0.42 |  |  |  |
| 35 | 19.514 | 0.63 |  |  |  |
| 36 | 19.772 | 0.32 |  |  |  |
| 37 | 19.824 | 0.46 |  |  |  |
| 38 | 19.998 | 2.71 | 93 | 1419 | Viridiflorene |
| 39 | 20.107 | 0.64 |  |  |  |
| 40 | 20.204 | 0.12 |  |  |  |
| 41 | 20.460 | 2.86 | 94 | 1435 | γ-Muurolene |
| 42 | 20.590 | 0.68 |  |  |  |
| 43 | 20.683 | 2.96 | 89 | 1469 | delta-Cadinene |
| 44 | 20.829 | 0.24 |  |  |  |
| 45 | 20.999 | 0.34 |  |  |  |
| 46 | 21.156 | 0.35 |  |  |  |
| 47 | 21.393 | 0.41 |  |  |  |
| 48 | 21.599 | 2.65 | 94 | 1530 | Epiglobulol |
| 49 | 21.764 | 1.33 | 90 | 1530 | Ledol |
| 50 | 21.876 | 0.30 |  |  |  |
| 51 | 22.072 | 1.67 | 95 | 1536 | (-)-Spathulenol |
| 52 | 22.259 | 7.71 | 95 | 1530 | Globulol |
| 53 | 22.415 | 4.85 | 89 | 1530 | Viridiflorol |
| 54 | 22.504 | 0.05 |  |  |  |
| 55 | 22.623 | 2.38 | 83 | 1580 | Cubenol |
| 56 | 22.746 | 0.24 |  |  |  |
| 57 | 22.904 | 1.12 |  |  | NI |
| 58 | 23.074 | 1.85 |  |  | NI |
| 59 | 23.186 | 2.70 | 79 | 1580 | (-)-delta-Cadinol |
| 60 | 23.275 | 0.03 |  |  |  |
| 61 | 23.473 | 2.16 | 90 | 1580 | t-Cadinol |
| 62 | 23.615 | 0.36 |  |  |  |
| 63 | 23.724 | 0.76 |  |  |  |
| 64 | 23.820 | 0.62 |  |  |  |
| 65 | 23.921 | 0.08 |  |  |  |
| 66 | 24.104 | 0.06 |  |  |  |
| 67 | 24.255 | 0.41 |  |  |  |
| 68 | 27.704 | 0.26 |  |  |  |
| 69 | 29.321 | 0.04 |  |  |  |
| 70 | 32.875 | 0.17 |  |  |  |
| Total |  | 100 |  |  |  |
| TR: Retention Time; LRI: Linear Retention Index; NI: not identified | | | | | |


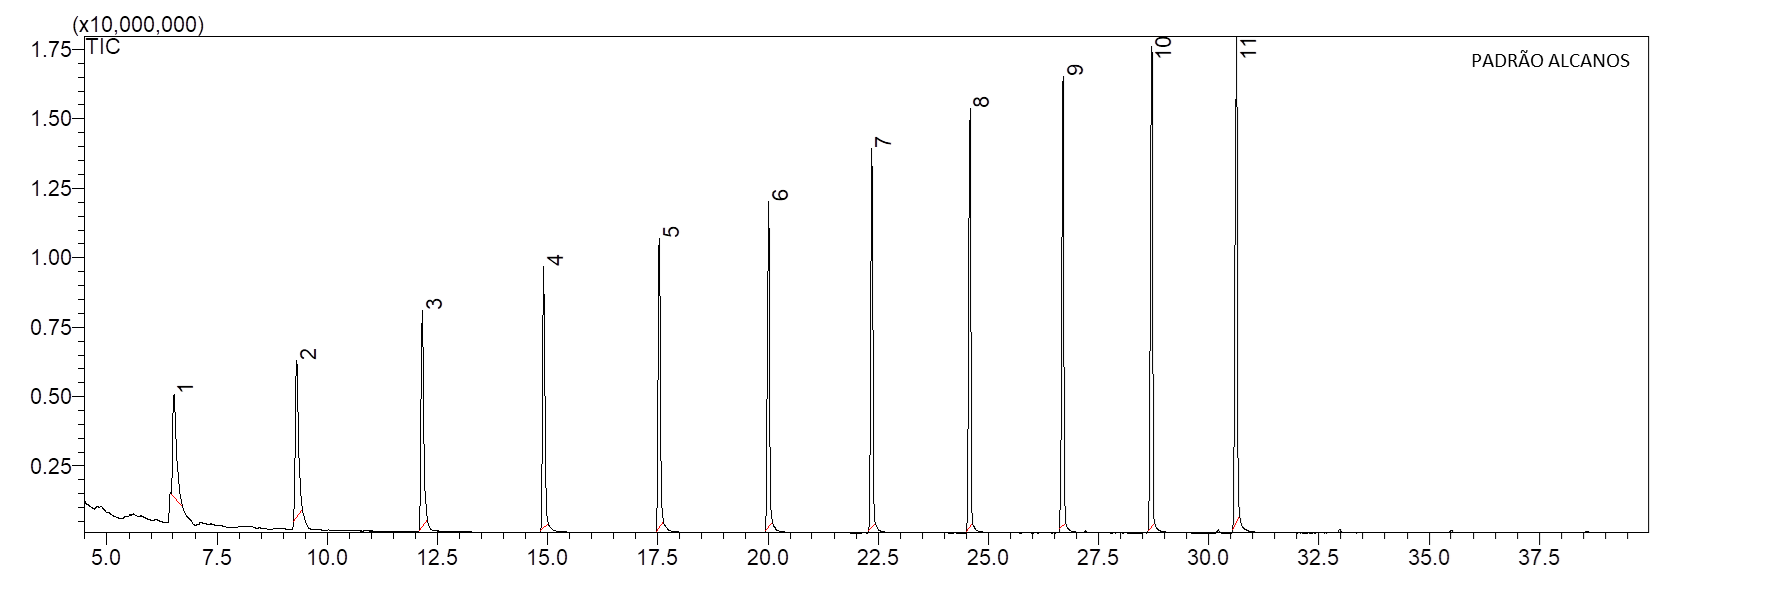


**Figure 1S.** Chromatogram obtained from GC-MS analysis of standard sample of n-alkanes (C8–C20).


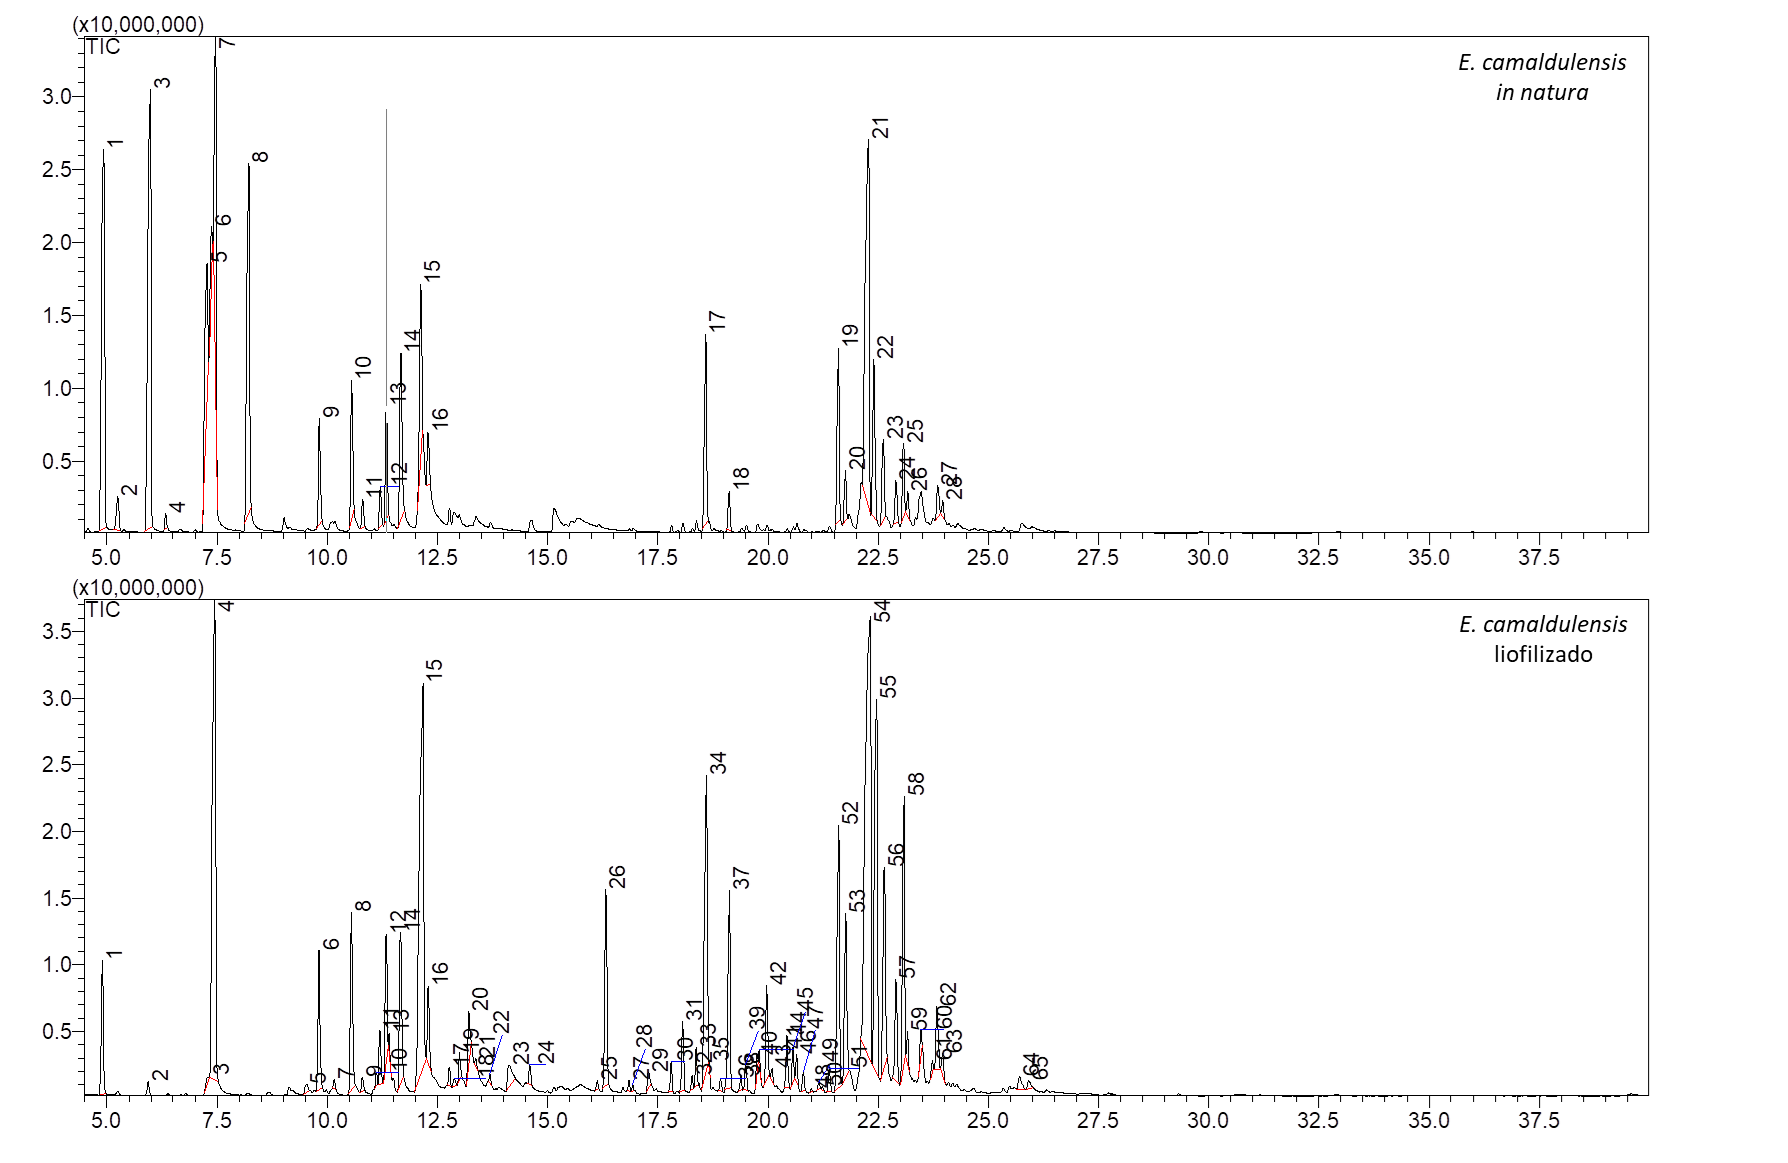


**Figure 2S.** Chromatogram obtained from the GC-MS analysis of the essential oil of *E. camaldulensis* extracted from the fresh leaves of adult plants grown in the field and the essential oil of *E. camaldulensis* extracted from the lyophilized leaves of young plants grown in the greenhouse.


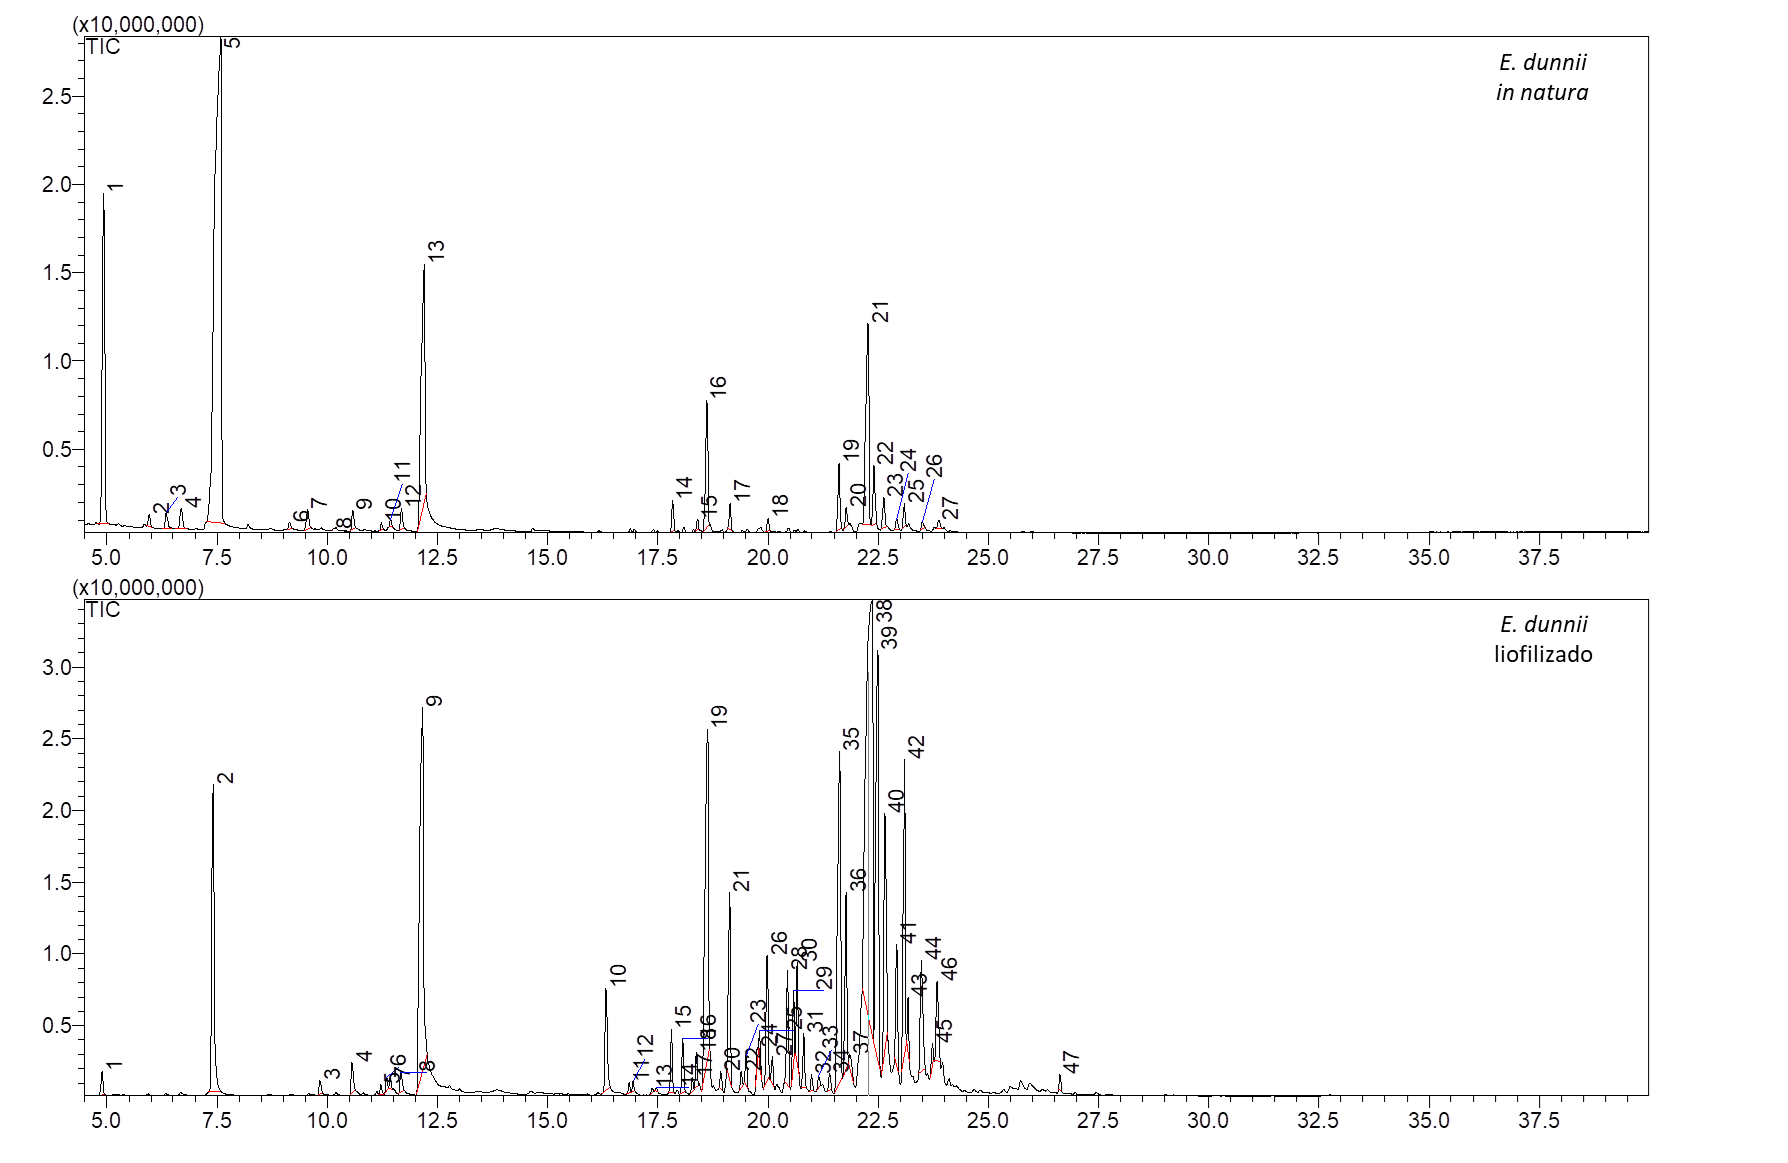


**Figure 3S.** Chromatogram obtained from the GC-MS analysis of *E. dunnii* essential oil extracted from fresh leaves of adult plants grown in field and E*. dunnii* essential oil extracted from freeze-dried leaves of young plants grown in greenhouse.


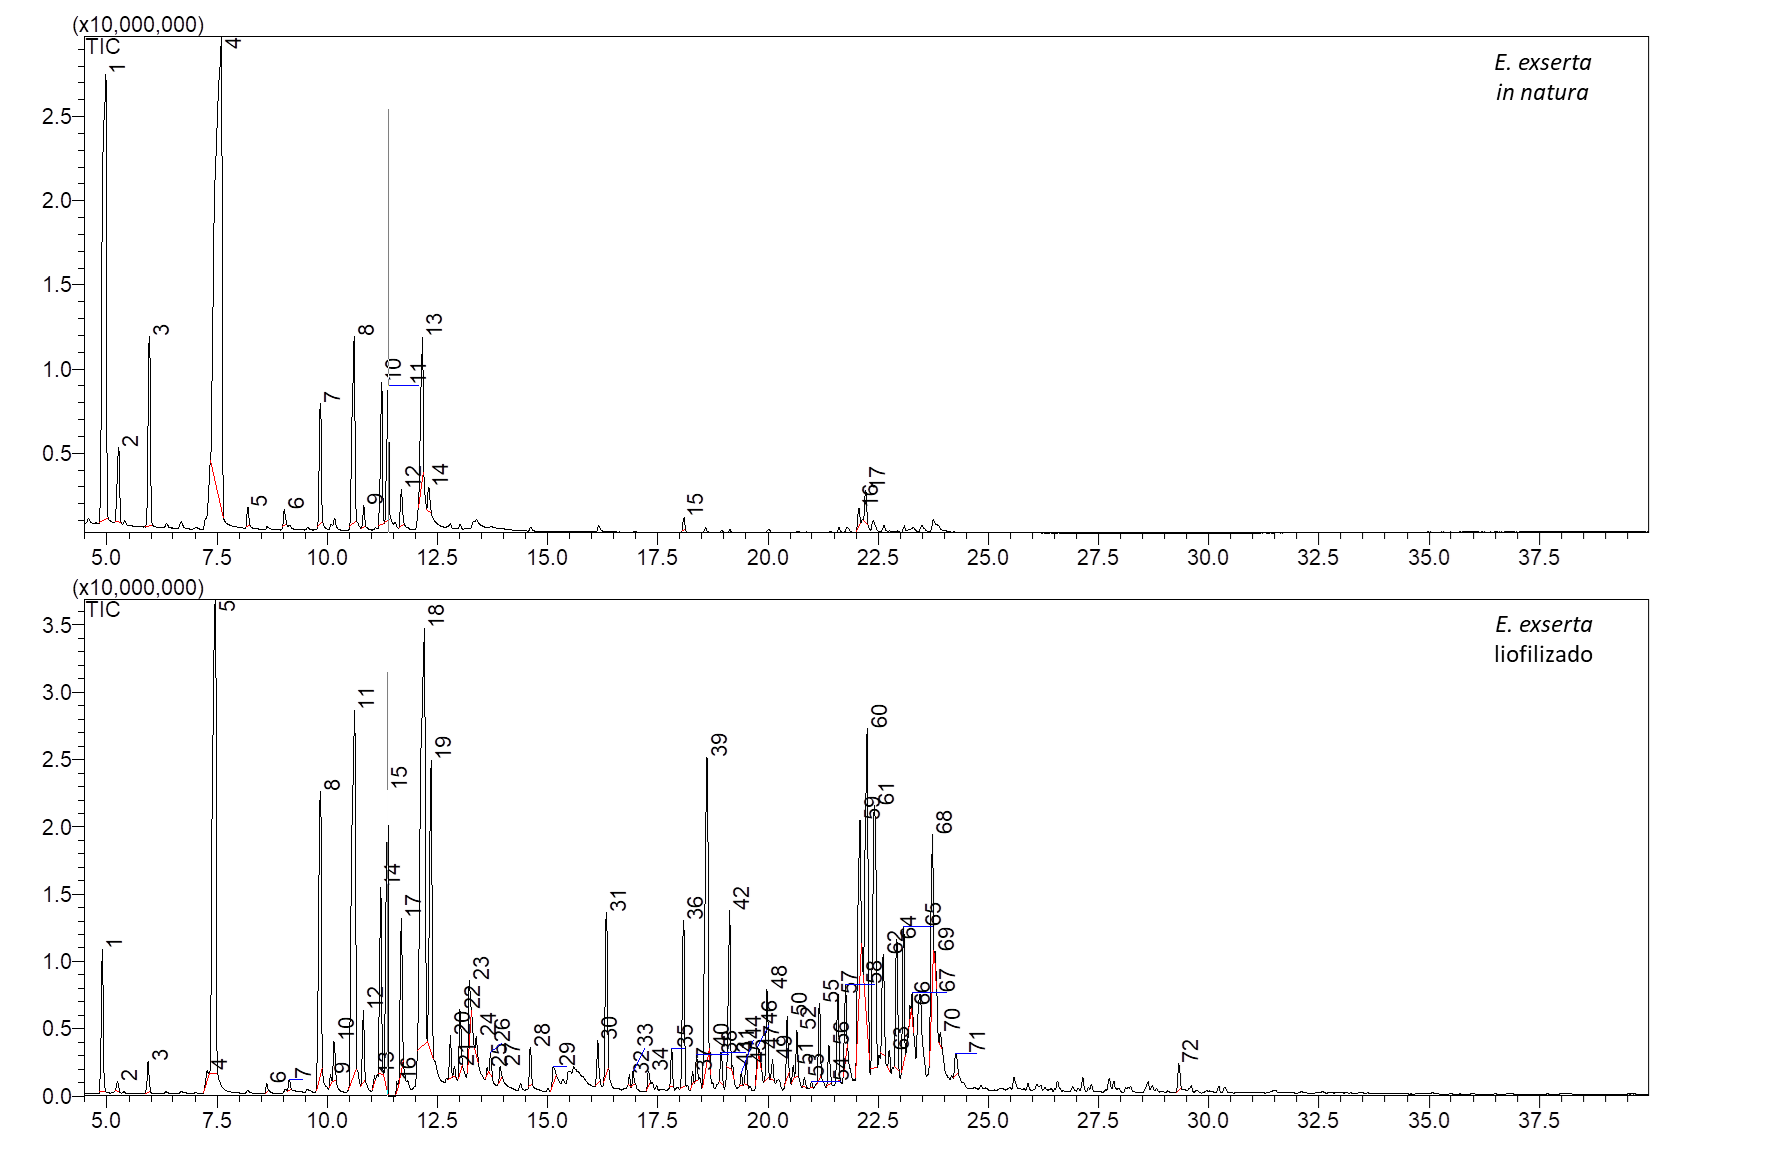


**Figure 4S.** Chromatogram obtained from GC-MS analysis of *E. exserta* essential oil extracted from fresh leaves of adult plants grown in field and E*. exserta* essential oil extracted from freeze-dried leaves of young plants grown in greenhouse.


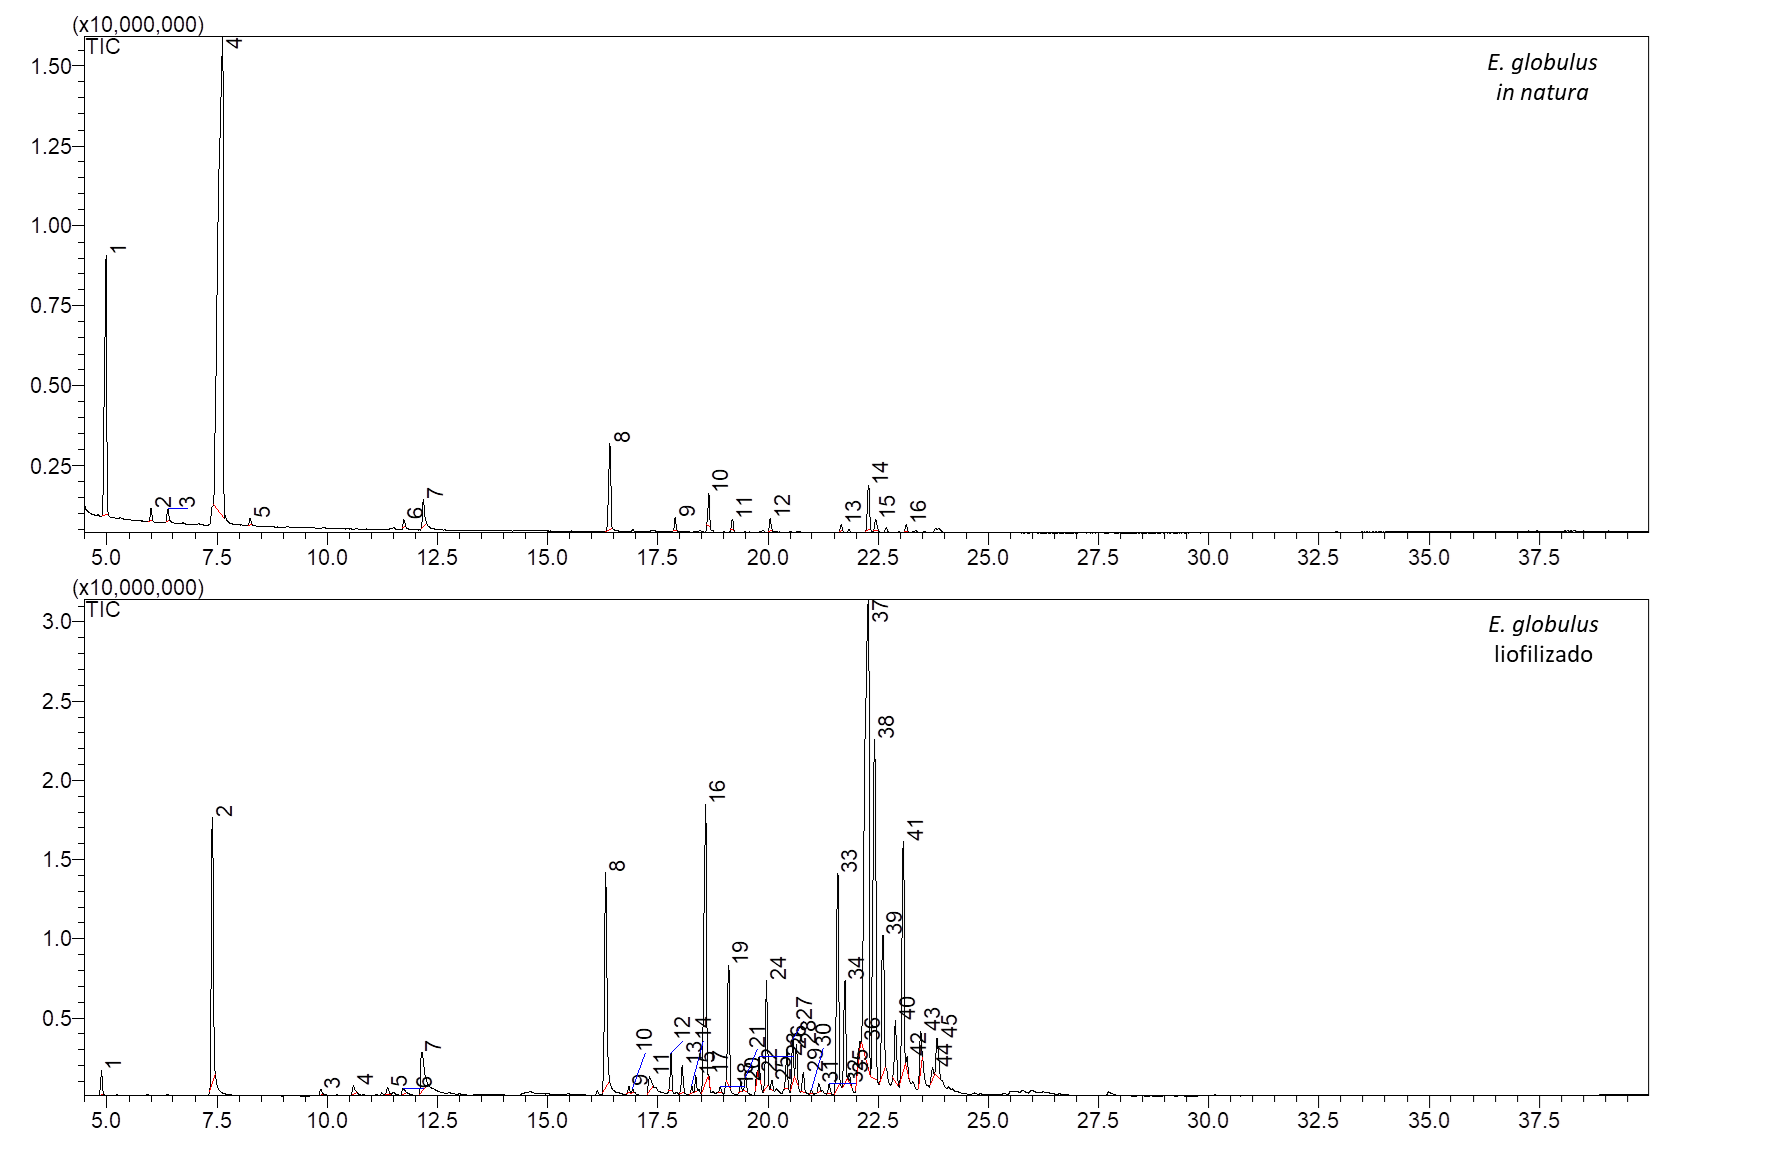


**Figure 5S.** Chromatogram obtained from the GC-MS analysis of E. *globulus* essential oil extracted from fresh leaves of adult plants grown in field and E*. globulus* essential oil extracted from freeze-dried leaves of young plants grown in greenhouse.

**Figure 6S.** Chromatogram obtained from the GC-MS analysis of *E. grandis* essential oil extracted from fresh leaves of adult plants grown in field and E*. grandis* essential oil extracted from freeze-dried leaves of young plants grown in greenhouse.


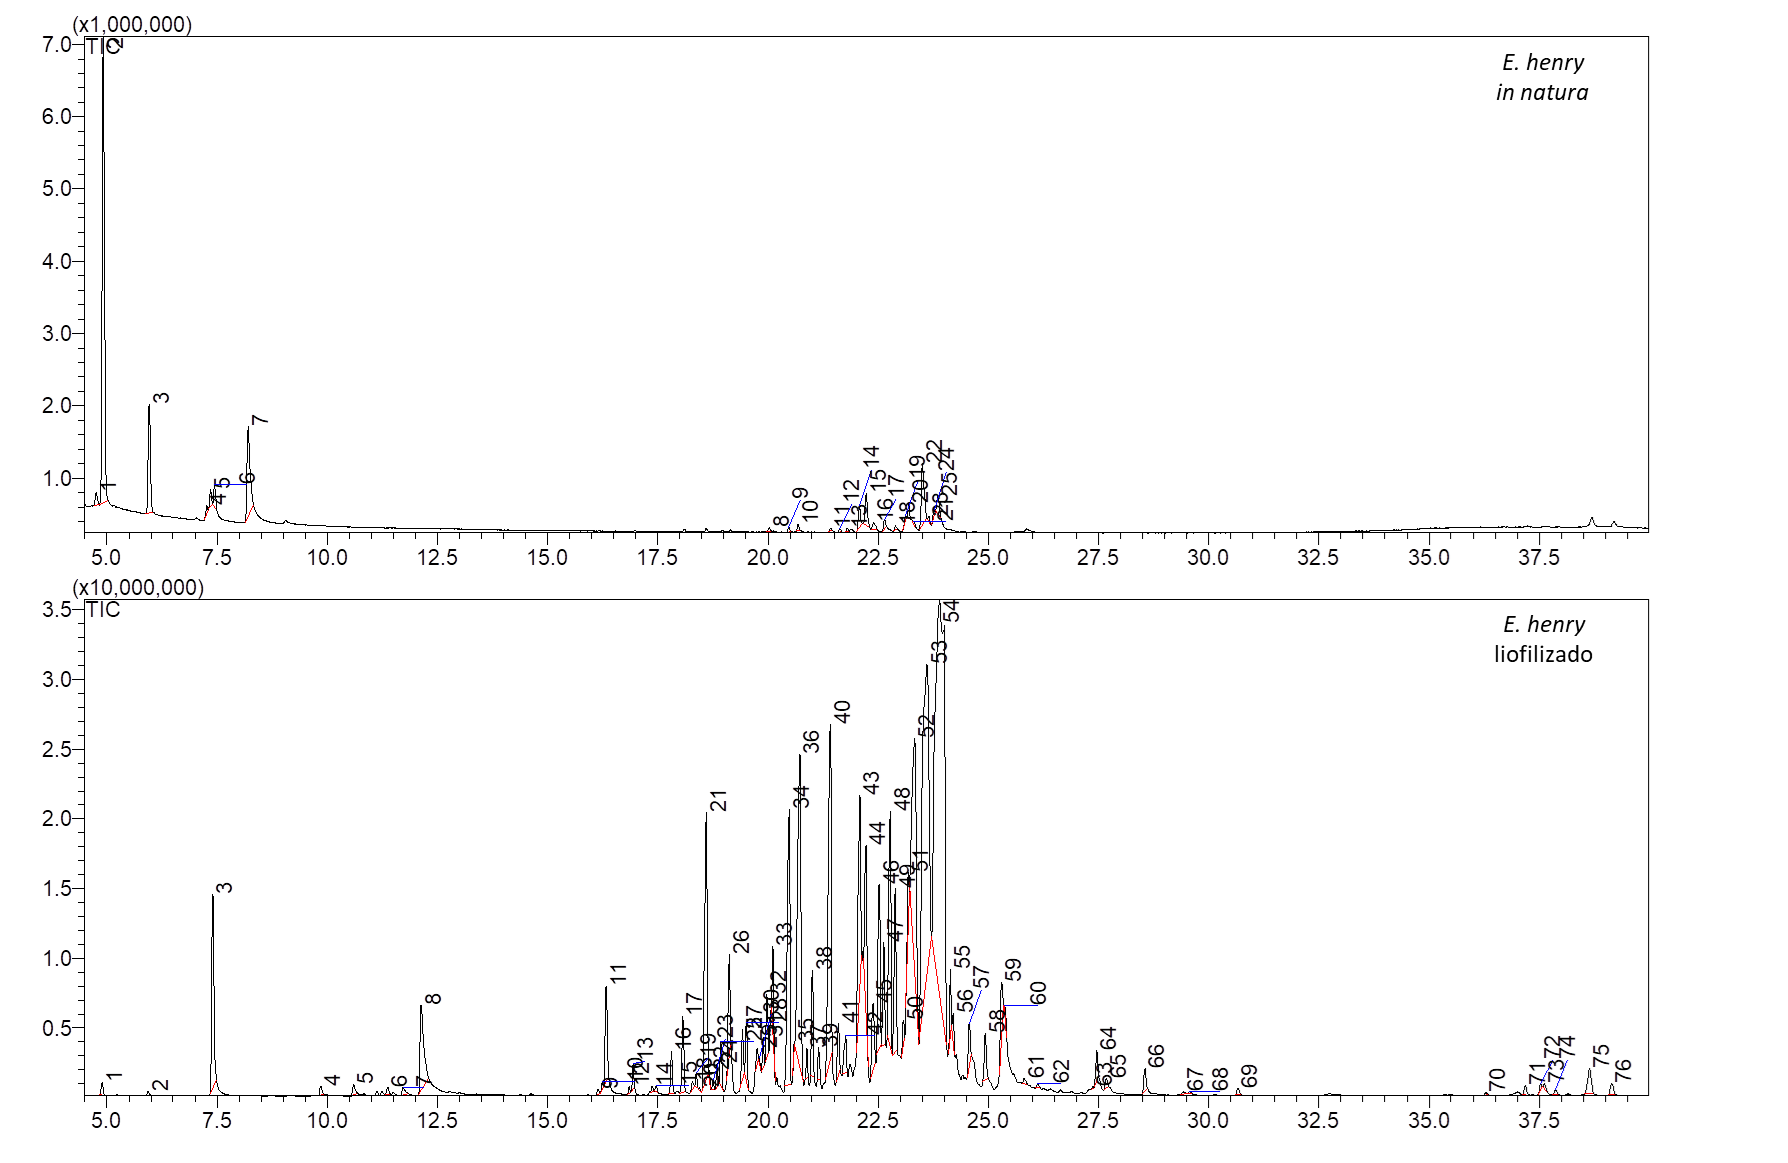


**Figure 7S.** Chromatogram obtained from the analysis by GC-MS of *C. henryi* essential oil extracted from fresh leaves of adult plants grown in field and C*. henryi* essential oil extracted from freeze-dried leaves of young plants grown in greenhouse.


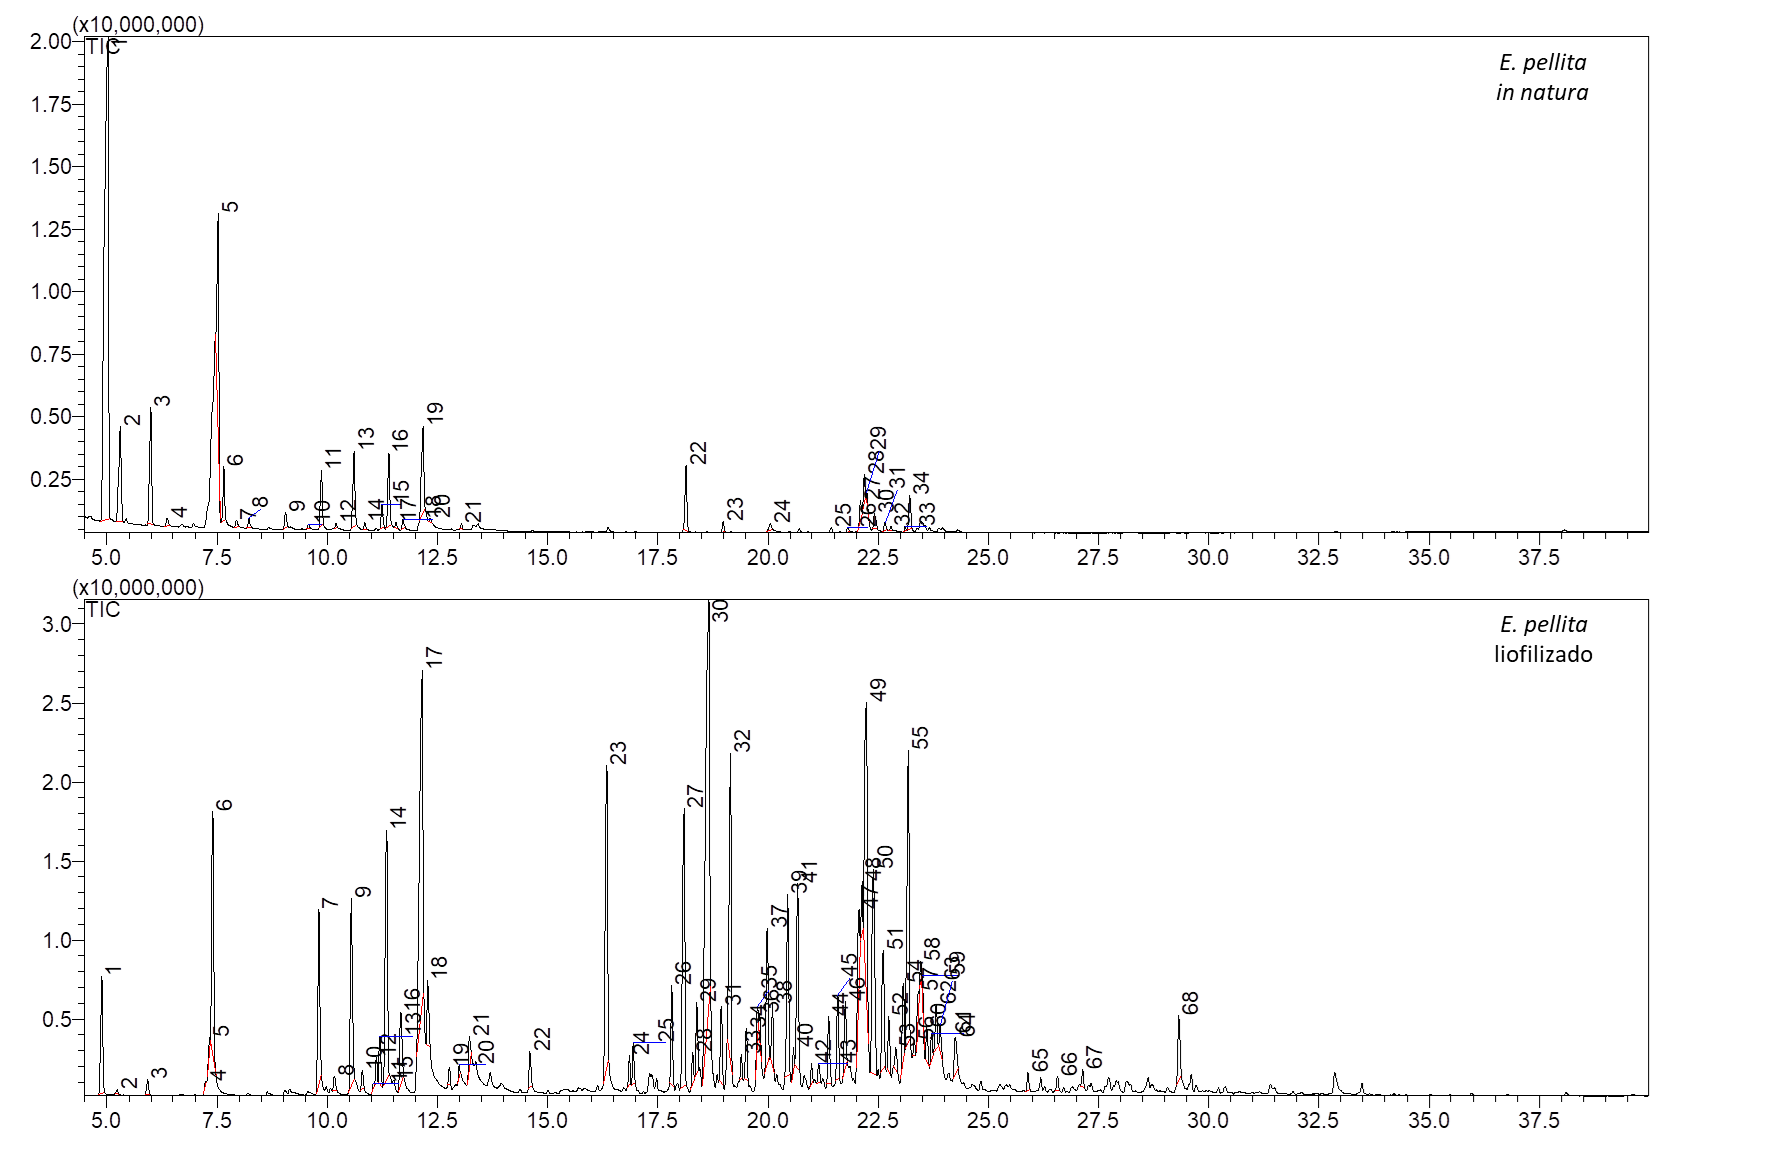


**Figure 8S.** Chromatogram obtained from the GC-MS analysis of *E. pellita* essential oil extracted from fresh leaves of adult plants grown in field and E*. pellita* essential oil extracted from freeze-dried leaves of young plants grown in greenhouse.


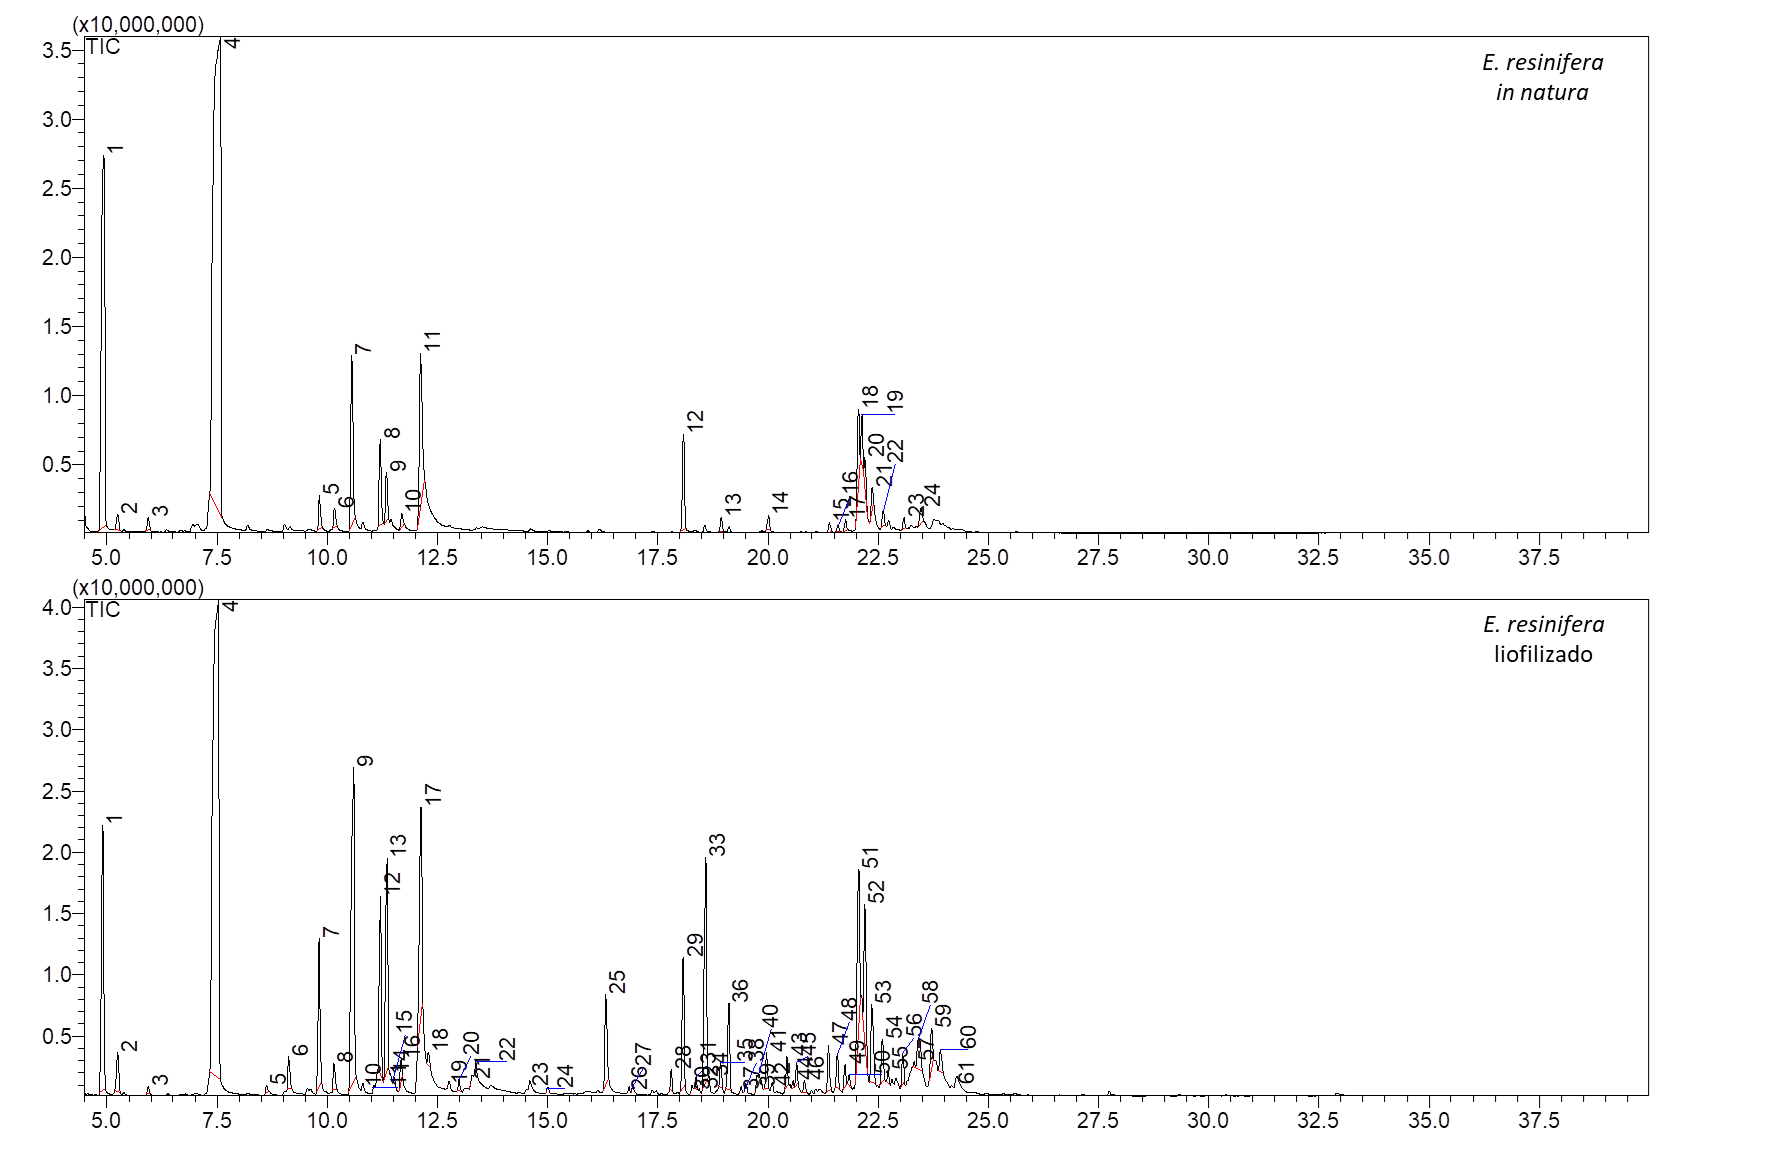


**Figure 9S.** Chromatogram obtained from the GC-MS analysis of *E. resinifera* essential oil extracted from fresh leaves of adult plants grown in field and E*. resinifera* essential oil extracted from freeze-dried leaves of young plants grown in greenhouse.


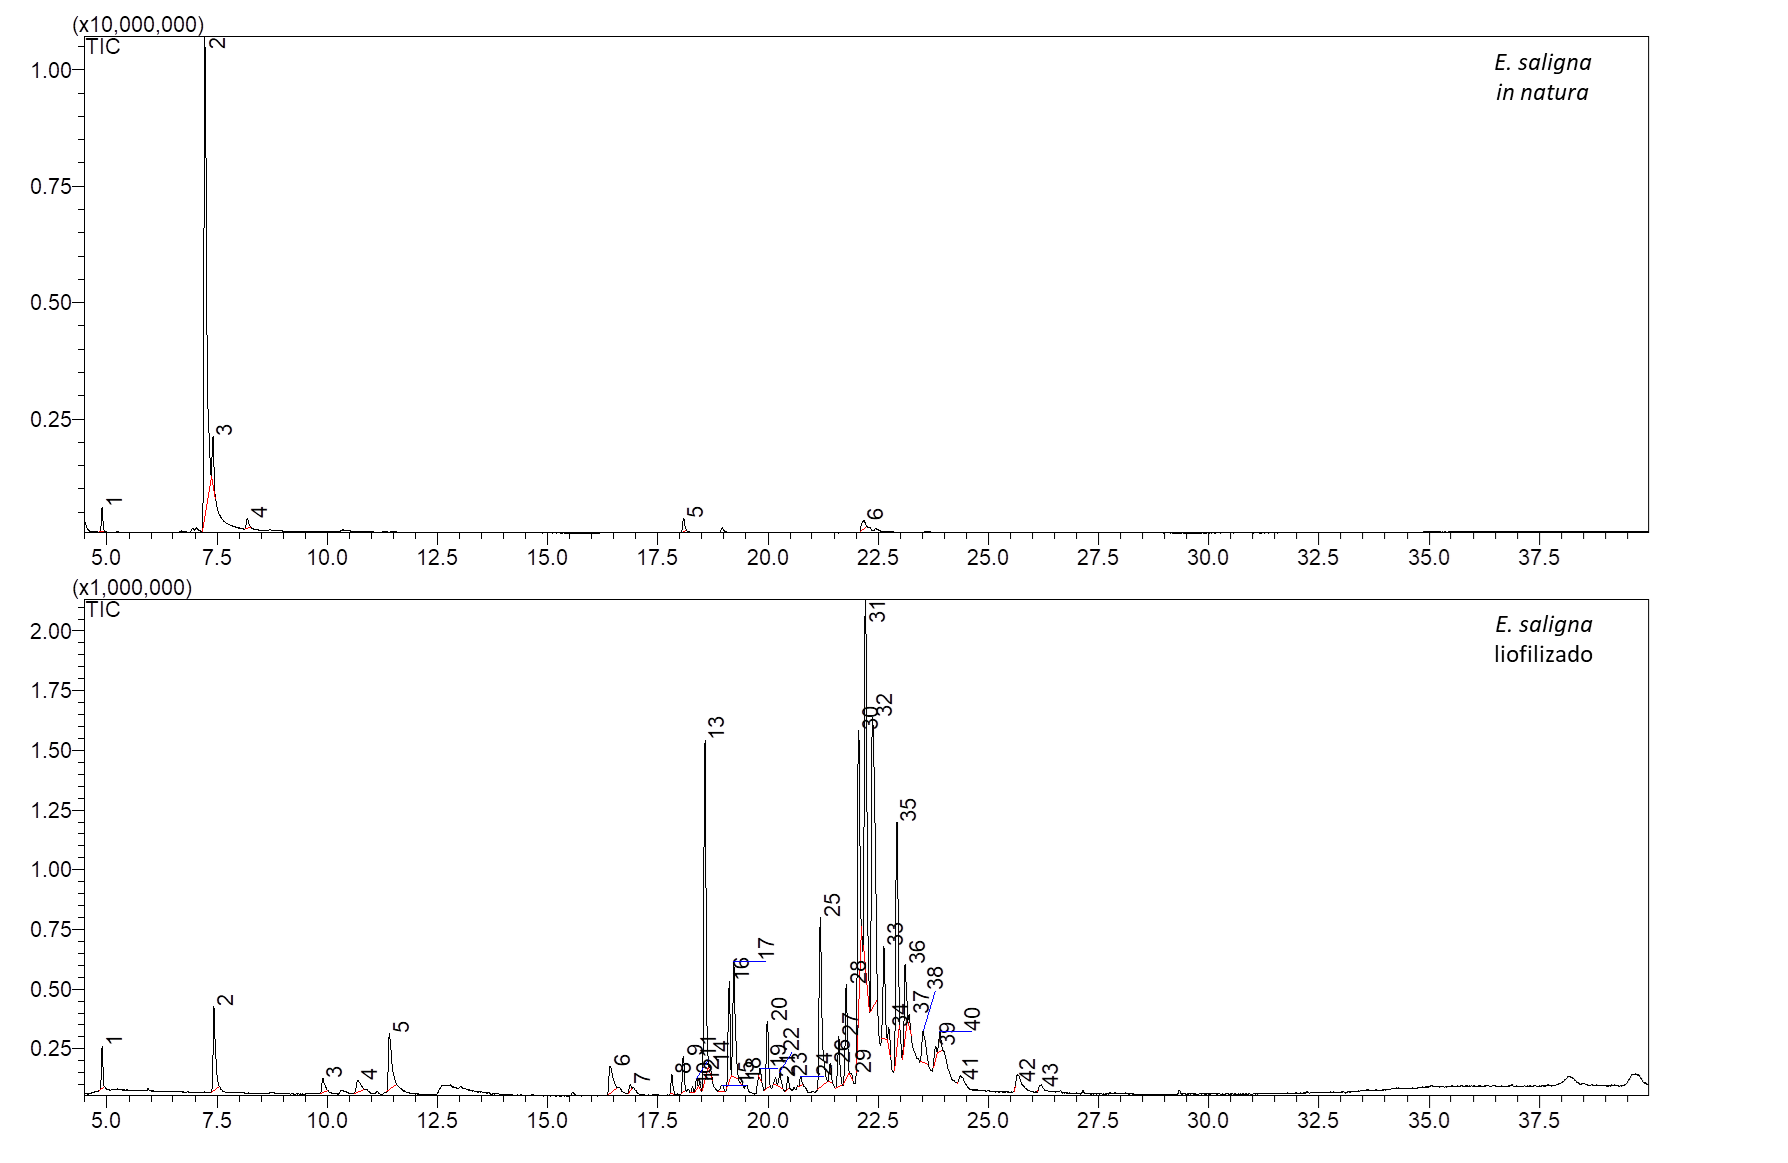


**Figure 10S.** Chromatogram obtained from GC-MS analysis of *E. saligna* essential oil extracted from fresh leaves of adult plants grown in field and E*. saligna* essential oil extracted from freeze-dried leaves of young plants grown in greenhouse.


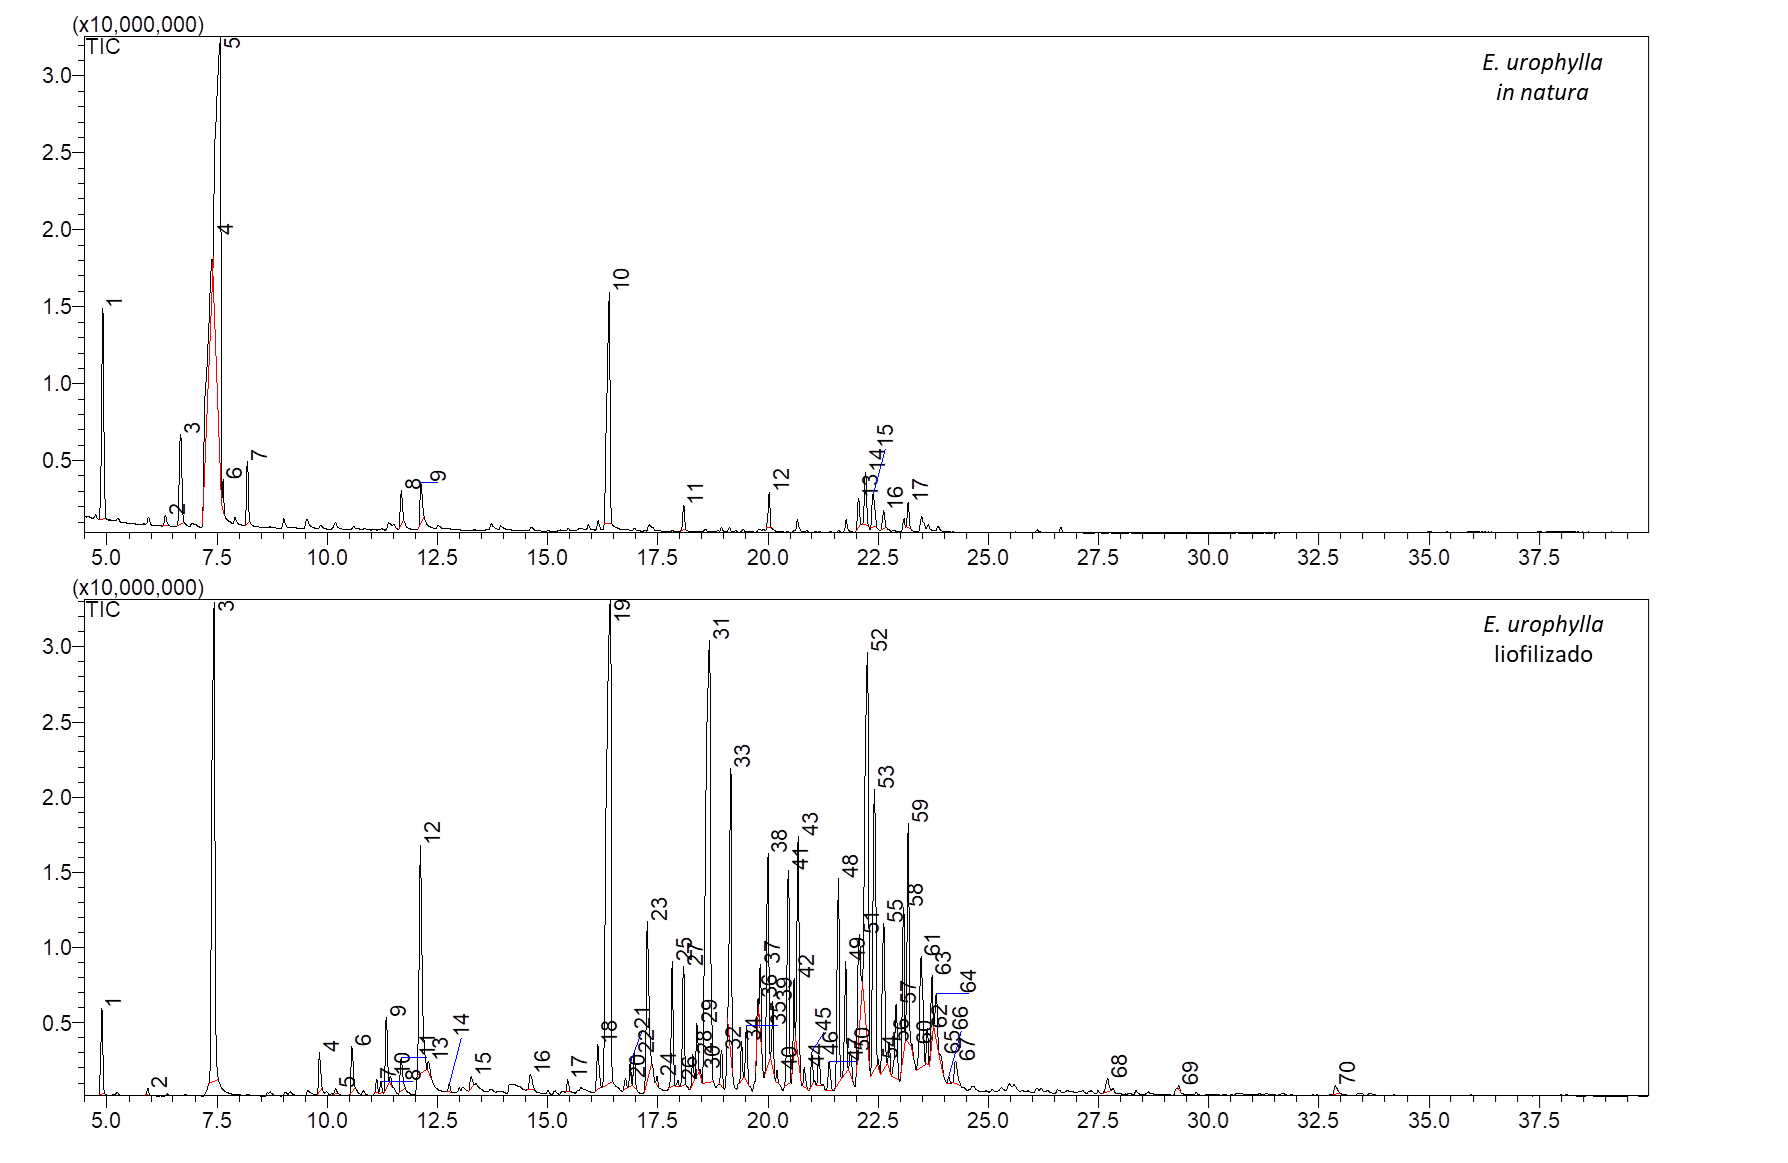


**Figure 11S.** Chromatogram obtained from the GC-MS analysis of *E. urophylla* essential oil extracted from fresh leaves of adult plants grown in field and E*. urophylla* essential oil extracted from freeze-dried leaves of young plants grown in greenhouse.
